# Supplementary material for: The child's perspective on discomfort during medical research procedures: a descriptive study
Source: PubMed Central journal article supplement — BMJ Open. 2017 Aug 1;7(7):e016077. doi: 10.1136/bmjopen-2017-016077 (PMC5642655; doi:10.1136/bmjopen-2017-016077), 2017-08-01
Supplement: bmjopen-2017-016077.draft_revisions.pdf [file bmjopen-2017-016077.draft_revisions.pdf]

# BMJ Open

BMJ Open is committed to open peer review. As part of this commitment we make the peer review history of every article we publish publicly available.

When an article is published we post the peer reviewers' comments and the authors' responses online. We also post the versions of the paper that were used during peer review. These are the versions that the peer review comments apply to.

The versions of the paper that follow are the versions that were submitted during the peer review process. They are not the versions of record or the final published versions. They should not be cited or distributed as the published version of this manuscript.

BMJ Open is an open access journal and the full, final, typeset and author-corrected version of record of the manuscript is available on our site with no access controls, subscription charges or pay-per-view fees (<http://bmjopen.bmj.com>).

If you have any questions on BMJ Open's open peer review process please email [editorial.bmjopen@bmj.com](mailto:editorial.bmjopen@bmj.com)

# BMJ Open

## The child's perspective on discomfort during medical research procedures: a descriptive study

|                                 |                                                                                                                                                                                                                                                                                                                                                                                                                                                                                                                                                                                                                                                                                                                                                                                                                                                                                                                                                                                                                                                                                                                                                                                                                                                                                                                                                                                                                                                                                                                                                                                                                                                                                                                                                                                                                                   |
|---------------------------------|-----------------------------------------------------------------------------------------------------------------------------------------------------------------------------------------------------------------------------------------------------------------------------------------------------------------------------------------------------------------------------------------------------------------------------------------------------------------------------------------------------------------------------------------------------------------------------------------------------------------------------------------------------------------------------------------------------------------------------------------------------------------------------------------------------------------------------------------------------------------------------------------------------------------------------------------------------------------------------------------------------------------------------------------------------------------------------------------------------------------------------------------------------------------------------------------------------------------------------------------------------------------------------------------------------------------------------------------------------------------------------------------------------------------------------------------------------------------------------------------------------------------------------------------------------------------------------------------------------------------------------------------------------------------------------------------------------------------------------------------------------------------------------------------------------------------------------------|
| Journal:                        | <i>BMJ Open</i>                                                                                                                                                                                                                                                                                                                                                                                                                                                                                                                                                                                                                                                                                                                                                                                                                                                                                                                                                                                                                                                                                                                                                                                                                                                                                                                                                                                                                                                                                                                                                                                                                                                                                                                                                                                                                   |
| Manuscript ID                   | bmjopen-2017-016077                                                                                                                                                                                                                                                                                                                                                                                                                                                                                                                                                                                                                                                                                                                                                                                                                                                                                                                                                                                                                                                                                                                                                                                                                                                                                                                                                                                                                                                                                                                                                                                                                                                                                                                                                                                                               |
| Article Type:                   | Research                                                                                                                                                                                                                                                                                                                                                                                                                                                                                                                                                                                                                                                                                                                                                                                                                                                                                                                                                                                                                                                                                                                                                                                                                                                                                                                                                                                                                                                                                                                                                                                                                                                                                                                                                                                                                          |
| Date Submitted by the Author:   | 25-Jan-2017                                                                                                                                                                                                                                                                                                                                                                                                                                                                                                                                                                                                                                                                                                                                                                                                                                                                                                                                                                                                                                                                                                                                                                                                                                                                                                                                                                                                                                                                                                                                                                                                                                                                                                                                                                                                                       |
| Complete List of Authors:       | <p>Staphorst, Mira; Erasmus University Medical Center, Psychiatry, section Medical Psychology and Psychotherapy; Emma Kinderziekenhuis AMC, Paediatrics</p> <p>Benninga, Marc; University of Amsterdam, Department of Pediatric Gastroenterology and Nutrition</p> <p>Bisschoff, Margriet; Erasmus University Medical Center</p> <p>Bon, Irma; VU medisch centrum</p> <p>Busschbach, Jan; Erasmus MC, Department of Psychiatry, Section of Medical Psychology &amp; Psychotherapy</p> <p>Diederens, Kay; Emma Kinderziekenhuis AMC, Paediatrics</p> <p>van Goudoever, Johannes; VU University Medical Center (VUmc), Pediatrics; Academic Medical Center, Pediatrics</p> <p>Haarman, Eric; VU medisch centrum</p> <p>Hunfeld, Joke; Erasmus University Medical Center, Psychiatry, section Medical Psychology and Psychotherapy</p> <p>Jaddoe, Vincent; Erasmus Medical Centre</p> <p>de Jong, Karin; Academisch Centrum Tandheelkunde Amsterdam</p> <p>de Jongste, Johan; Erasmus MC / Sophia Childrens Hospital, Paediatrics</p> <p>Kindermann, Angelika; Emma Kinderziekenhuis AMC, Paediatrics</p> <p>Königs, Marsh; Vrije Universiteit Amsterdam</p> <p>Oosterlaan, Jaap; Vrije Universiteit Amsterdam</p> <p>Passchier, Jan; VU University, Department of Clinical Psychology/EMGO+</p> <p>Pijnenburg, Marielle; Erasmus MC / Sophia Childrens Hospital, Paediatrics</p> <p>Renemna, Liesbeth; Academic Medical Center</p> <p>de Ridder, Lissy; Erasmus MC / Sophia Childrens Hospital, Paediatrics</p> <p>Tamminga, Hyke; Academic Medical Center</p> <p>Tiemeier, Henning; Erasmus Medical Center, Child and Adolescent Psychiatry/Psychology</p> <p>Timman, Reinier; Erasmus MC, Department of Psychiatry, Section of Medical Psychology &amp; Psychotherapy</p> <p>van de Vathorst, Suzanne; Erasmus Medical Centre</p> |
| <b>Primary Subject Heading</b>: | Paediatrics                                                                                                                                                                                                                                                                                                                                                                                                                                                                                                                                                                                                                                                                                                                                                                                                                                                                                                                                                                                                                                                                                                                                                                                                                                                                                                                                                                                                                                                                                                                                                                                                                                                                                                                                                                                                                       |
| Secondary Subject Heading:      | Ethics, Evidence based practice                                                                                                                                                                                                                                                                                                                                                                                                                                                                                                                                                                                                                                                                                                                                                                                                                                                                                                                                                                                                                                                                                                                                                                                                                                                                                                                                                                                                                                                                                                                                                                                                                                                                                                                                                                                                   |
| Keywords:                       | ETHICS (see Medical Ethics), MEDICAL ETHICS, PAEDIATRICS                                                                                                                                                                                                                                                                                                                                                                                                                                                                                                                                                                                                                                                                                                                                                                                                                                                                                                                                                                                                                                                                                                                                                                                                                                                                                                                                                                                                                                                                                                                                                                                                                                                                                                                                                                          |
|                                 |                                                                                                                                                                                                                                                                                                                                                                                                                                                                                                                                                                                                                                                                                                                                                                                                                                                                                                                                                                                                                                                                                                                                                                                                                                                                                                                                                                                                                                                                                                                                                                                                                                                                                                                                                                                                                                   |

1  
2  
3  
4  
5  
6  
7  
8  
9  
10  
11  
12  
13  
14  
15  
16  
17  
18  
19  
20  
21  
22  
23  
24  
25  
26  
27  
28  
29  
30  
31  
32  
33  
34  
35  
36  
37  
38  
39  
40  
41  
42  
43  
44  
45  
46  
47  
48  
49  
50  
51  
52  
53  
54  
55  
56  
57  
58  
59  
60

SCHOLARONE™  
Manuscripts

For peer review only

1  
2  
3 **The child's perspective on discomfort during medical research procedures: a descriptive**  
4 **study**  
5  
6  
7  
8  
9

10 Mira S. Staphorst<sup>1,2</sup> on behalf of the BURDEN-group  
11  
12  
13

14  
15 **The BURDEN-group:**  
16

17 Marc A. Benninga<sup>2</sup>, Margriet Bisschoff<sup>3</sup>, Irma Bon<sup>4</sup>, Jan J.V. Busschbach<sup>1</sup>, Kay Diederens<sup>2</sup>,  
18 Johannes B. van Goudoever<sup>2,4</sup>, Eric G. Haarman<sup>4</sup>, Joke A.M. Hunfeld<sup>1</sup>, Vincent V.W. Jaddoe<sup>3</sup>,  
19 Karin J.M. de Jong<sup>5</sup>, Johan C. de Jongste<sup>3</sup>, Angelika Kindermann<sup>2</sup>, Marsh Königs<sup>6</sup>, Jaap  
20 Oosterlaan<sup>6</sup>, Jan Passchier<sup>7</sup>, Mariëlle W. Pijnenburg<sup>3</sup>, Liesbeth Reneman<sup>2</sup>, Lissy de Ridder<sup>3</sup>,  
21 Hyke G. Tamminga<sup>2</sup>, Henning W. Tiemeier<sup>3</sup>, Reinier Timman<sup>1</sup>, Suzanne van de Vathorst<sup>8</sup>  
22  
23  
24  
25  
26  
27  
28  
29  
30  
31

32 **Affiliations**  
33

34 <sup>1</sup> Department of Psychiatry, section Medical Psychology and Psychotherapy, Erasmus University  
35 Medical Centre, Rotterdam, the Netherlands  
36  
37

38 <sup>2</sup> Department of Paediatrics, Emma Children's Hospital, Academic Medical Center (AMC),  
39 Amsterdam, the Netherlands  
40  
41  
42

43 <sup>3</sup> Departments of Paediatrics and Child Psychiatry, Sophia Children's Hospital, Erasmus  
44 University Medical Centre, Rotterdam, the Netherlands  
45  
46  
47

48 <sup>4</sup> Department of Paediatrics, VU University Medical Centre (VUmc), Amsterdam, the  
49 Netherlands  
50  
51

52 <sup>5</sup> Department of Pedodontology, Academic Centre Dentistry Amsterdam (ACTA), Amsterdam,  
53 the Netherlands  
54  
55  
56  
57  
58  
59  
60

1  
2  
3 <sup>6</sup>Section of Clinical Neuropsychology, VU University, Amsterdam, the Netherlands  
4

5  
6 <sup>7</sup>Department of Clinical Psychology/EMGO+, VU University, Amsterdam, the Netherlands  
7

8  
9 <sup>8</sup>Department of Ethics and Philosophy, Erasmus University Medical Centre, Rotterdam, the  
10  
11 Netherlands

12  
13  
14  
15 **Corresponding author**

16  
17 Mira S. Staphorst, MSc.

18  
19 Department of Psychiatry, section Medical Psychology and Psychotherapy

20  
21 Erasmus University Medical Centre

22  
23 PO box 2040

24  
25  
26 3000 CA Rotterdam

27  
28  
29 the Netherlands

30  
31 Phone: +31 10 7038336

32  
33 Email: mstaphorst@gmail.com  
34  
35  
36  
37

38 **Keywords:** child; discomfort; ethics; research participation; self report  
39  
40  
41

42  
43 **Word count:** 3027 words  
44  
45  
46  
47  
48  
49  
50  
51  
52  
53  
54  
55  
56  
57  
58  
59  
60

## ABSTRACT

**Objective:** the evaluation of discomfort in paediatric research is scarcely evidence-based. In this study, we make a start in describing children's self-reported discomfort during common medical research procedures, compare this with discomfort during dental check-ups, and explore whether age, anxiety-proneness, gender, medical condition, and previous experiences are related to discomfort. We also describe children's suggestions for reducing discomfort.

**Design:** cross-sectional descriptive study.

**Setting:** paediatric research at three academic hospitals.

**Patients:** 357 children with and without illnesses (8-18 years, mean=10.6 years) were enrolled: 307 from paediatric research studies and 50 from dental care.

**Main outcome measures:** we measured various generic forms of discomfort (nervousness, annoyance, pain, fright, boredom, tiredness) due to six common research procedures: buccal swabs, MRI-scans, pulmonary function tests, skin prick tests, ultrasound imaging and venipunctures.

**Results:** most children reported limited discomfort during the research procedures (means: 1.0-2.6 on a scale from 1-5). Compared with dental check-ups, buccal swab tests, skin prick tests and ultrasound imaging were less discomforting, while MRI-scans, venipunctures and pulmonary function tests caused a similar degree of discomfort. 60.3% of the children suggested providing distraction by showing movies to reduce discomfort. Only anxiety-proneness was positively related to discomfort.

**Conclusions:** the findings of this study support the acceptability of participation of children in the studied research procedures, which stimulates evidence-based research practice. Furthermore,

1  
2  
3  
4  
5  
6  
7  
8  
9  
10  
11  
12  
13  
14  
15  
16  
17  
18  
19  
20  
21  
22  
23  
24  
25  
26  
27  
28  
29  
30  
31  
32  
33  
34  
35  
36  
37  
38  
39  
40  
41  
42  
43  
44  
45  
46  
47  
48  
49  
50  
51  
52  
53  
54  
55  
56  
57  
58  
59  
60

the present study can be considered as a first step in providing benchmarks for discomfort of procedures in paediatric research.

For peer review only

### Strengths and limitations of this study

- This is the first large-scale study on children's discomfort of research procedures.
- The findings of this study support the acceptability of participation of children in the studied research procedures, which stimulates evidence-based research practice.
- This study can help to establish benchmarks for discomfort of research procedures in pediatric research.
- We included a limited number of children for measuring discomfort, of which most were healthy 11-year-olds. For generalizability, future research should include larger numbers and more heterogeneous groups of children.
- Although this study gives insight into the degree of discomfort, it needs to be established whether these degrees correspond with minimal, a minor increase over minimal discomfort, or more than minimal discomfort.
- A limitation of this study is the cross-sectional design for comparing discomfort during research procedures and dental check-ups. A design with paired measurements from the same child might have given a better estimation.



## INTRODUCTION

There is a need to improve treatments and licensed medication for children by conducting paediatric research. For instance, it is estimated that 25 to 65% of all prescribed paediatric drugs are used off-label,[1] which exposes children to an increased risk of medication under- or overdose. Paediatric research, however, is complicated by the obligation to protect children against the risks and discomfort of research procedures. It is the responsibility of Institutional Review Boards (IRBs) to estimate the risks and discomfort of research procedures, and evaluate whether these are acceptable for the children. Primarily in case of discomfort, IRBs base this evaluation on their intuition and experiences, which may not necessarily give a representative view of children's experiences.[2-5] Consequently, this can lead to the rejection of studies when discomfort is expected to be excessive, and vice versa.

Unfortunately, there is a lack on data on children's discomfort. In this study we therefore make a start in describing children's self-reported discomfort during research procedures. These data are an important first step in providing an empirical basis for the evaluation by IRBs and eventually providing benchmarks for the level of discomfort that might be expected for children with a given procedure.

We measured discomfort during research *procedures* instead of during a research study *as a whole* to make the results generalizable to children who undergo these procedures in future research and because IRBs often evaluate the research procedures of a study separately.[6-8] By addressing research procedures, this study provides a crucial complement to previous studies that have measured children's overall reactions to participation in research studies, such as the understanding of your rights of being a research participant.[9-12] We compared the outcomes to discomfort of children during dental check-ups, which enabled us to compare discomfort

1  
2  
3 experienced in research with a medical procedure most children encounter ('reference level').  
4  
5 Furthermore, we explored whether age, anxiety-proneness, gender, medical condition and  
6  
7 previous experiences with the procedure were related to children's discomfort. In addition,  
8  
9 children were asked for suggestions to reduce discomfort.  
10  
11

## 12 13 14 15 **MATERIALS AND METHODS**

### 16 17 18 **Participants**

19  
20 We used a convenience sample in which we aimed to include 50 children for each research  
21  
22 procedure, or as much we could enrol within the timeframe of our study.[13] Children were  
23  
24 eligible to participate if they met the following criteria: a) aged between 8-18 years, b) fluent in  
25  
26 Dutch, c) no current psychological treatment for pain or anxiety disorders, d) no psychosocial  
27  
28 problems as diagnosed in the Diagnostic and Statistical Manual of Mental Disorders at the time  
29  
30 of enrolment, and e) accompanied by a parent or caretaker. This information was determined by  
31  
32 consultation of parent(s) or the child's medical record.  
33  
34  
35

36  
37 The children were recruited from research studies being conducted at three academic  
38  
39 hospitals in the Netherlands. In addition, children without a known illness who had had a check-  
40  
41 up visit to the dentist were included. The same inclusion criteria were applied to this group.  
42  
43

44  
45 Children were enrolled between March 2014 and June 2015.  
46  
47

### 48 49 **Procedure**

50  
51 First, the researchers conducting the research studies approached children and their parents if  
52  
53 they were willing to participate in our study. Interested children and parents were provided with  
54  
55 more information about the study by the first author or a research assistant. After agreement,  
56  
57  
58  
59  
60

1  
2  
3 written consent from parents and written child assent (>12 years) were obtained. Children  
4  
5 younger than twelve gave oral assent to participate. Directly after the research procedure, the  
6  
7 children completed two questionnaires on an iPad mini tablet to measure discomfort and anxiety-  
8  
9 proneness. Parents provided demographic information. All children received a gift card (€7.50)  
10  
11 after completing the questionnaires.  
12  
13  
14  
15

## 16 17 18 **Instruments**

### 19 20 **Discomfort**

21  
22 We developed the Children's Discomfort during Research Procedures Questionnaire (CDRPQ)  
23  
24 because no appropriate instrument existed for the aim of the current study.[14] Instruments that  
25  
26 measure children's self-reported experiences in medical situations often focus on the  
27  
28 measurement of pain, distress or anxiety. Discomfort - which is mentioned as an important  
29  
30 assessment criterion for research participation in most ethics guidelines and regulations - also  
31  
32 involves other aspects than pain, distress and anxiety, as was shown in an interview study we  
33  
34 conducted about the face-validity of discomfort from the child's perspective.[15] Measuring  
35  
36 various forms of discomfort therefore provides a more thorough measure of the child's  
37  
38 discomfort than only focusing on anxiety or pain. We aimed for an instrument that measures  
39  
40 forms of discomfort that are applicable to all kinds of research procedures. Therefore the  
41  
42 CDRPQ can be considered as a generic questionnaire.  
43  
44  
45  
46  
47

48  
49 The CDRPQ contains: 1) six questions about generic types of discomfort (nervousness,  
50  
51 annoyance, pain, fright, boredom, and tiredness), which are measured using Likert scales ranging  
52  
53 from 1='not discomforting' to 5='extremely discomforting', and 2) one open question about  
54  
55 suggestions for reducing discomfort (Appendix A. Note: the CDRPQ was developed in Dutch  
56  
57  
58  
59  
60

1  
2  
3 and then translated to English for this manuscript). Validity and test-retest reliability were  
4  
5 acceptable.[14]  
6  
7

### 8 9 10 Anxiety-proneness

11  
12 The influence of anxiety-proneness on discomfort was measured using the Dutch translation of  
13 the trait scale of the State-Trait Anxiety Inventory for Children (STAI-C),[16] or the anxiety  
14 scale of the Child Behaviour Checklist (CBCL),[16] depending on which questionnaire was  
15 already being used by the participating studies. Previous research shows that there are little  
16 differences in measuring anxiety by the trait scale of the STAI-C and the anxiety scale of the  
17 CBCL when parent-reported,[17] and that these scales are highly correlated ( $r=0.77$ ).[18] The  
18 trait scale of the STAI-C is self-reported and addresses the frequency and intensity of anxiety  
19 symptoms in general. It consists of 20 items (e.g. “*I worry about school*”).[19] The STAI-C trait  
20 scale has shown good internal consistency (Cronbach’s  $\alpha>0.80$ ) and acceptable test–retest  
21 reliability ( $r>0.65$ ).[20] The anxiety scale of the CBCL is parent-reported and includes six  
22 questions on anxiety problems (e.g. “fear of animals, situations or places”). The CBCL has  
23 shown good validity and reliability.[16]  
24  
25  
26  
27  
28  
29  
30  
31  
32  
33  
34  
35  
36  
37  
38  
39  
40  
41  
42

### 43 Demographics

44  
45 Parents provided information on demographics.  
46  
47  
48  
49

### 50 Medical procedures

#### 51 Research procedures

52  
53 We measured children’s experiences during six research procedures: buccal swabs, MRI-scans,  
54  
55  
56  
57  
58  
59  
60

1  
2  
3 pulmonary function tests, skin prick tests, ultrasound imaging and venipunctures (Table 1). The  
4  
5 research procedures were selected based on the following criteria: no general anaesthesia  
6  
7 necessary, perceived by a consulted group of paediatric healthcare professionals as possibly  
8  
9 causing discomfort, and performed in the participating hospitals during the timeframe of our  
10  
11 study. Almost all children underwent the research procedures for non-therapeutic research  
12  
13 purposes; the pulmonary function tests and some venepunctures were performed as part of  
14  
15 therapeutic research studies.  
16  
17  
18  
19  
20  
21

## 22 Dentist

23  
24 We measured the experiences of a group of children without a known illness during regular  
25  
26 check-up visits to a general academic dental centre (Table 1). Fifth-year dentistry students  
27  
28 perform supervised dental check-ups on children at this academic dental centre.  
29  
30  
31  
32  
33

## 34 Data analysis

35  
36 The data were analysed using SPSS version 21. For each procedure, we calculated the means of  
37  
38 the different forms of discomfort, the percentage who reported the research procedure as 'very'  
39  
40 or 'extremely' discomforting, and an average discomfort score based on the six forms of  
41  
42 discomfort. As most data were skewed, we used non-parametric statistics. A Kruskal-Wallis Test  
43  
44 and Mann-Whitney U tests were used to explore differences between the procedures in the  
45  
46 average discomfort score. We used Spearman correlations to explore the relation between the  
47  
48 average discomfort score, and age and anxiety-proneness. Mann-Whitney U tests were used to  
49  
50 explore differences in the average discomfort score between children with and without an illness,  
51  
52 boys and girls, and children with and without previous experiences. We did a multivariate  
53  
54  
55  
56  
57  
58  
59  
60

1  
2  
3 analysis to measure the variance in discomfort explained by the above-mentioned factors. The  
4 first author coded the question ‘What would you suggest to make [*procedure X*] less annoying?’  
5  
6 into categories. A supervising researcher checked these categories (JH), and disagreements were  
7  
8 discussed until consensus was reached.  
9  
10  
11

## 12 13 14 15 **Ethical approval**

16  
17 The IRB of the VU Medical Centre in Amsterdam (The Netherlands) indicated that there was no  
18 risk or discomfort associated with this study (i.e. completing the questionnaires), and stated that  
19 it is exempt from requiring approval under Dutch Law (2014/010).  
20  
21  
22  
23  
24  
25

## 26 27 **RESULTS**

### 28 29 **Participants**

30  
31 434 children were potentially suitable for participation in our study, of which 38 children (8.8%)  
32 did not meet the inclusion criteria (24 in research and 14 from the dental clinic): two children did  
33 not speak Dutch fluently, five children were not accompanied by a parent and 31 children were  
34 too young or too old. Of the 396 children who were invited to participate, 357 children agreed to  
35 participate (90.2%). The most frequently mentioned reason for declining was lack of time of the  
36 parents (56%), followed by ‘no interest’ (26%). 307 children were enrolled from clinical  
37 research, and 50 from an academic dental clinic. The majority of the children did not have a  
38 known illness (85.2%). Mean age was 10.6 years. Further characteristics of the children are  
39 presented in Table 2.  
40  
41  
42  
43  
44  
45  
46  
47  
48  
49  
50  
51

### 52 53 54 55 **Discomfort during research procedures (CDRPQ)**

1  
2  
3 Table 3 shows the discomfort children experienced: the mean of each form of discomfort, and  
4 the percentage of children who reported 'very' (score 4) or 'extreme' (score 5) discomfort. For  
5 almost all procedures, the mean scores on the different forms of discomfort were low. Exceptions  
6 were: children undergoing the buccal swab test generally indicated that they were 'slightly'  
7 bored; most children felt the MRI-scan was 'slightly' tiring and 19% felt it was 'very' or  
8 'extremely' tiring.  
9

10  
11  
12  
13  
14  
15  
16  
17  
18  
19  
20  
21  
22  
23  
24  
25  
26  
27  
28  
29  
30  
31  
32  
33  
34  
35  
36  
37  
38  
39  
40  
41  
42  
43  
44  
45  
46  
47  
48  
49  
50  
51  
52  
53  
54  
55  
56  
57  
58  
59  
60

There were significant differences in discomfort between the procedures ( $p < 0.001$ ). Compared to check-up visits to the dentist, discomfort of buccal swab tests, skin prick tests and ultrasound imaging were less discomforting ( $p = 0.002-0.007$ ), while MRI-scans, venipunctures and pulmonary function tests caused a similar degree of discomfort ( $p = 0.05-0.26$ ).

### **Suggestions to reduce discomfort**

A large group of the children in clinical research (62.6%) suggested that distraction during the research procedures, preferably in the form of a movie, would reduce discomfort (Table 4).

### **Potential influencing factors**

There was a significant correlation between anxiety-proneness, measured with the STAI-C ( $p = 0.004$ ), and discomfort. Anxiety-proneness, measured with the CBCL ( $p = 0.09$ ), and discomfort showed a trend for a correlation between these factors. There was no significant correlation between age and discomfort ( $p = 0.32$ ). There were no significant differences in discomfort between healthy children and children with a chronic condition ( $p = 0.78$ ), boys and girls ( $p = 0.89$ ), and children who had a previous experience or children who underwent the research procedure for the first time ( $p = 0.31$ ). Regarding the multivariate analysis, anxiety-

1  
2  
3  
4  
5  
6  
7  
8  
9  
10  
11  
12  
13  
14  
15  
16  
17  
18  
19  
20  
21  
22  
23  
24  
25  
26  
27  
28  
29  
30  
31  
32  
33  
34  
35  
36  
37  
38  
39  
40  
41  
42  
43  
44  
45  
46  
47  
48  
49  
50  
51  
52  
53  
54  
55  
56  
57  
58  
59  
60

proneness appeared to be significantly related to discomfort ( $\beta=0.315$ ,  $p=0.005$ ). The total model, however, was not significant ( $p=0.088$ ); it only explained 11.6% of the variance of discomfort.

## DISCUSSION

This is the first large-scale study investigating children's self-reported discomfort during research procedures. It is in line with the trend of actively involving children in expressing their experiences in medical and research situations. Our study shows that children experienced limited discomfort during the studied research procedures.

Although the studied research procedures may not be the most invasive ones, it is important to have actual data on the discomfort children experience during these research procedures rather than making assumptions. Besides, research shows that there are significant differences in the evaluation of discomfort of some of these research procedures in similar children (i.e. healthy 11-year-olds) among IRB members,[21, 22] which supports the importance of self-reported data by children during the evaluation of study protocols.

Looking at the different forms of discomfort, it is remarkable that the scores of the children in our study on being bored and tired are higher than the scores on the other forms of discomfort. Although a boring or tiring research procedure may not be considered by IRBs as unacceptable in terms of discomfort, these are important forms of discomfort for children and can be a reason for them to refuse undergoing this procedure (in the future). For this reason, we believe it is important that these forms of discomfort are explicitly taken into account when evaluating discomfort by IRBs.



1  
2  
3 In several ethics codes and guidelines, minimizing discomfort is a requirement for  
4 paediatric research.[23, 24] According to the majority of the children in our study, distraction  
5 can help to achieve this. Distraction is proven to be (cost-)effective in reducing discomfort  
6 during medical procedures in children of all ages.[25-30] While children preferred to be  
7 distracted by movies, during some procedures it may be more feasible to distract children by  
8 providing music, toys, or decoration on walls and ceilings.  
9  
10  
11  
12  
13  
14  
15  
16  
17  
18  
19

### 20 **Strengths and limitations**

21  
22 The outcomes of this study can help to establish benchmarks for the discomfort of research  
23 procedures in children, and thereby assist IRBs, paediatric researchers, parents and children in  
24 their estimation of the acceptability of these procedures for research participation. Other  
25 strengths of the study are the multi-site enrolment for generalizability; the large number of  
26 children in some of the procedures; the comparison with a common 'everyday' medical  
27 procedure (i.e. a dental check-up); the use of a specifically developed questionnaire to measure  
28 different forms of discomfort (CDRPQ); and the suggestions for reducing discomfort.  
29  
30  
31  
32  
33  
34  
35  
36  
37  
38

39 As we were dependent on the participating studies, we were unable to include the  
40 intended number of children for some procedures, because fewer children took part in these  
41 studies than expected, or were included at a later stage than initially planned. This has reduced  
42 the power of the outcomes of some research procedures (e.g. pulmonary function tests). On the  
43 other hand, the power of the outcomes of other procedures was enlarged because more children  
44 were included than planned (e.g. MRI-scans).  
45  
46  
47  
48  
49  
50  
51  
52  
53  
54  
55  
56  
57  
58  
59  
60

1  
2  
3 We used different groups of children to compare discomfort in clinical research with  
4 dental check-ups. A design with paired measurements from the same child might have given a  
5 better estimation.  
6  
7  
8  
9

10 Furthermore, the degree of discomfort may be relative to the presence of other research  
11 procedures the children underwent in the studies. As there was little variation in their ratings of  
12 discomfort, we assume that the other research procedures did not have much influence on  
13 children's reports.  
14  
15  
16  
17  
18  
19

20 All children included in our study assented to undergo the research procedures, which is  
21 why our study might be hampered by a selection bias (note: this is applicable to all studies  
22 investigating children's experiences in paediatric research). It may be possible that highly  
23 anxious children declined to undergo the research procedures because of expected discomfort or  
24 anxiousness, or that they may not have been approached to participate for this reason (i.e.  
25 gatekeeping by the researcher/paediatrician).[31] The fact that we did not have to exclude  
26 children with anxiety-disorders (i.e. one of the exclusion criteria) nor that children did have high  
27 scores on the anxiety-proneness measures, supports this. The findings of this study therefore  
28 cannot just be generalized to children in clinical care.  
29  
30  
31  
32  
33  
34  
35  
36  
37  
38  
39  
40  
41  
42

### 43 **Implications and recommendations for those involved in pediatric research**

#### 44 **Ethics committees**

45  
46 We encourage ethics committees to use self-reported data of the children when evaluating  
47 discomfort for reasons mentioned above. To be able to use children's self-reported information  
48 on discomfort of *all* kinds of research procedures and across children from all kinds of  
49 backgrounds, it is needed that these data are collected and disseminated. Ethics committees can  
50  
51  
52  
53  
54  
55  
56  
57  
58  
59  
60

1  
2  
3 play a key role in this by requiring these data as part of a study protocol and recommending  
4  
5 pediatric researchers to register children's experiences.  
6  
7  
8  
9

#### 10 Pediatric researchers

11  
12 We recommend that pediatric researchers routinely include a brief assessment of the impact of  
13 the research procedures of their studies by asking the participating children, e.g. the CDRPQ,  
14  
15 which we developed for this purpose. To avoid overloading pediatric researchers with extra work  
16  
17 and responsibilities during a study visit, it would be ideal if children can report their experiences  
18  
19 and responsibilities during a study visit, it would be ideal if children can report their experiences  
20  
21 directly on a website/app. As such, paediatrics researchers can limit their tasks to emphasizing  
22  
23 the opportunity and importance of reporting these experiences to children (and their parents) and  
24  
25 to refer them to the website/app concerned. Of course, this website/app need to be developed  
26  
27 first.  
28  
29  
30

31  
32 During the informed consent procedure, we encourage researchers providing parents and  
33  
34 children with information on expected discomfort of research procedures based on empirical  
35  
36 data, in order to facilitate their decision-making for participation.  
37  
38

39 It is important that discomfort in pediatric research is reduced as much as possible. This  
40  
41 can be achieved by standard asking children for their suggestions to reduce discomfort, and - if  
42  
43 feasible - to apply these in their studies. As we showed in this study, many children suggested  
44  
45 providing (more) distraction, for instance by showing short movies.  
46  
47  
48

#### 49 Children and parents

50  
51 For children (and parents) who are approached for research participation, it can be helpful when  
52  
53 they have access to information on discomfort of research procedures of children in previous  
54  
55  
56  
57  
58  
59  
60

1  
2  
3 research. It provides them with additional information on what to expect from undergoing  
4  
5 research procedures from the perspective of their peers. This information can facilitate decision-  
6  
7 making for (parts of) research participation, as they will be better informed. For instance, if the  
8  
9 majority of children do not experience a specific research procedure as discomfoting, it may be  
10  
11 a reason for others to agree with undergoing this procedure too.  
12  
13

14  
15 The availability of children's self-reported data on discomfort is dependent on the  
16  
17 willingness of children to report on their experiences during research participation. As we  
18  
19 learned from this study, most children are willing to report these experiences as long as it does  
20  
21 not require much extra time.  
22  
23

## 24 25 26 27 **Future research**

28  
29 For generalizability, future research should include larger numbers and more heterogeneous  
30  
31 groups of children, in particular during pulmonary function tests. Future research is also needed  
32  
33 to describe children's discomfort during other (more invasive) research procedures. We therefore  
34  
35 recommend paediatric researchers to include measures in their studies (e.g. CDRPQ) to  
36  
37 investigate discomfort related to the research procedures involved, and also disseminate these  
38  
39 results (note: recently in the Netherlands an addition to the law on research participation was  
40  
41 accepted which requires to define and monitor discomfort in paediatric research (parliamentary  
42  
43 meeting of October 25th, 2016).  
44  
45

46  
47 [https://www.eerstekamer.nl/wetsvoorstel/33508\_verrichten\_van\_medisch].  
48  
49

50  
51 For IRBs and paediatric researchers who evaluate the level of discomfort of (non-  
52  
53 therapeutic) research procedures, it is important to know which research procedures involve  
54  
55 minimal, a minor increase over minimal discomfort, or more than minimal discomfort.  
56  
57  
58  
59  
60

1  
2  
3 Unfortunately, there are no clear guidelines for this. Future research - in which IRBs, paediatric  
4  
5 researchers, children and their parents are consulted - is therefore needed to determine cut-off  
6  
7 levels for this.  
8  
9

## 10 11 12 **CONCLUSION**

13  
14  
15 Our findings support the acceptability of participation of children in the studied procedures for  
16  
17 research purposes because children experienced limited discomfort. The results are an important  
18  
19 first step in providing benchmarks for discomfort of research procedures in paediatric research,  
20  
21 and contribute to the evidence-based evaluation of discomfort in research.  
22  
23  
24  
25  
26  
27  
28  
29  
30  
31  
32  
33  
34  
35  
36  
37  
38  
39  
40  
41  
42  
43  
44  
45  
46  
47  
48  
49  
50  
51  
52  
53  
54  
55  
56  
57  
58  
59  
60

For peer review only

## REFERENCES

1. Kimland E, Odland V. Off-label drug use in pediatric patients. *Clin Pharmacol Ther* 2012;91:796-801
2. Chambers CT, Giesbrecht K, Craig KD, et al. A comparison of faces scales for the measurement of pediatric pain: children's and parents' ratings. *Pain* 1999;83:25-35 doi: S030439599900086X [pii]published Online First: Epub Date]].
3. McCarthy AM, Kleiber C, Hanrahan K, et al. Factors explaining children's responses to intravenous needle insertions. *Nurs Res* 2010;59:407-16 doi: 10.1097/NNR.0b013e3181f80ed5published Online First: Epub Date]].
4. Rid A, Emanuel EJ, Wendler D. Evaluating the risks of clinical research. *JAMA* 2010;304:1472-9 doi: 10.1001/jama.2010.1414published Online First: Epub Date]].
5. Romsing J, Moller-Sonnergaard J, Hertel S, et al. Postoperative pain in children: comparison between ratings of children and nurses. *J Pain Symptom Manage* 1996;11:42-6 doi: 0885392495001360 [pii]published Online First: Epub Date]].
6. Weijer C. The ethical analysis of risk in intensive care unit research. *Crit Care* 2004;8:85-6
7. McRae A, Weijer C. U.S. Federal Regulations for emergency research: a practical guide and commentary. *Acad Emerg Med* 2008;15:88-97
8. Weijer C. The ethical analysis of risk. *J Law Med Ethics* 2000;28:344-61
9. Kassam-Adams N, Newman E. The reactions to research participation questionnaires for children and for parents (RRPQ-C and RRPQ-P). *Gen Hosp Psychiatry* 2002;24:336-42 doi: S0163834302002001 [pii]published Online First: Epub Date]].
10. Kassam-Adams N, Newman E. Child and parent reactions to participation in clinical research. *Gen Hosp Psychiatry* 2005;27:29-35 doi: S0163-8343(04)00106-9 [pii] 10.1016/j.genhosppsych.2004.08.007published Online First: Epub Date]].
11. Barakat LP, Patterson CA, Mondestin V, et al. Initial development of a questionnaire evaluating perceived benefits and barriers to pediatric clinical trials participation. *Contemp Clin Trials* 2013;34:218-26
12. Chu AT, DePrince AP, Weinzierl KM. Children's perception of research participation: Examining trauma exposure and distress. *Journal of Empirical Research on Human Research Ethics* 2008;3:pp doi: 10.1525/jer.2008.3.1.49 19385782published Online First: Epub Date]].
13. Staphorst MS, Hunfeld JA, Timman R, et al. Hearing the voices of children: self-reported information on children's experiences during research procedures: a study protocol. *BMJ Open* 2015;5:e009053 doi: bmjopen-2015-009053 [pii] 10.1136/bmjopen-2015-009053published Online First: Epub Date]].
14. Staphorst MS, Timman R, Passchier J, et al. The development of the 'Children's Discomfort During Research Procedures Questionnaire' (CDRPQ). Manuscript submitted for publication. 2016
15. Staphorst MS, Hunfeld JAM, van de Vathorst S, et al. Children's self reported discomforts as participants in clinical research. *Soc Sci Med* 2015;142:154-62 doi: 10.1016/j.socscimed.2015.08.019published Online First: Epub Date]].
16. Verhulst F, Van der Ende J, Koot H. Manual for the Child Behavior Checklist (in Dutch). Rotterdam: Department of Child and Adolescent Psychiatry, Erasmus Medical Centre/Sophia, 1996.

17. Seligman LD, Ollendick TH, Langley AK, et al. The utility of measures of child and adolescent anxiety: a meta-analytic review of the Revised Children's Manifest Anxiety Scale, the State-Trait Anxiety Inventory for Children, and the Child Behavior Checklist. *Journal of Clinical Child and Adolescent Psychology* 2004;33:557-65
18. Kendall PC, Pulkafico AC, Barmish AJ, et al. Assessing anxiety with the child behavior checklist and the teacher report form. *Journal of Anxiety Disorders* 2007;21:1004-15
19. Spielberger C. *Manual for the state-trait anxiety inventory for children*. Palo Alto, California, USA: Consulting Psychologists Press, 1973.
20. Bakker F, Wieringen Pv, Ploeg Hvd, et al. *Handleiding bij de Zelf- Beoordelings Vragenlijst voor Kinderen, ZBV-K [Manual for the Self-Evaluation Questionnaire for Children, STAIC]*. Lisse, Netherlands: Swets & Zeitlinger, 1989.
21. Shah S, Whittle A, Wilfond B, et al. How do institutional review boards apply the federal risk and benefit standards for pediatric research? *JAMA* 2004;291:476-82
22. Janofsky J, Starfield B. Assessment of risk in research on children. *J Pediatr* 1981;98:842-6
23. US Department of Health and Human Services. Code of Federal Regulations. Human Subjects Research (45 CFR 46). 102 (i). , Revised July 14, 2009.
24. European Parliament CotEC. *Directive 2001*. Luxembourg: Office for Official Publications of the European Communities, 2001.
25. Alvarez C, Fernández Marcos A. Psychological treatment of evoked pain and anxiety by invasive medical procedures in paediatric oncology. *Psychology in Spain* 1997;1:17-36
26. Uman L, Birnie K, Noel M, et al. Psychological interventions for needle-related procedural pain and distress in children and adolescents. *Cochrane Database of Systematic Reviews* 2013:CD005179
27. Broome ME, Rehwaldt M, Fogg L. Relationships between cognitive behavioral techniques, temperament, observed distress, and pain reports in children and adolescents during lumbar puncture. *J Pediatr Nurs* 1998;13:48-54
28. Dahlquist LM, Busby SM, Slifer KJ, et al. Distraction for children of different ages who undergo repeated needle sticks. *J Pediatr Oncol Nurs* 2002;19:22-34
29. Nguyen TN, Nilsson S, Hellstrom AL, et al. Music therapy to reduce pain and anxiety in children with cancer undergoing lumbar puncture: a randomized clinical trial. *J Pediatr Oncol Nurs* 2010;27:146-55
30. DeMore M, Cohen LL. Distraction for pediatric immunization pain: A critical review. *Journal of Clinical Psychology in Medical Settings* 2005;12:281-91 doi: DOI 10.1007/s10880-005-7813-1published Online First: Epub Date]].
31. Tromp K, Vathorst Svd. Gatekeeping by professionals in recruitment of pediatric research participants: Indeed an undesirable practice. *The American Journal of Bioethics* 2015;15:30-32

**Table 1.** Description of the medical procedures

| <b>Procedure</b>        | <b>Description</b>                                                                                                                                                                                                                            |
|-------------------------|-----------------------------------------------------------------------------------------------------------------------------------------------------------------------------------------------------------------------------------------------|
| Buccal swab test        | Taking mucosal epithelial cells from the inner cheek lining using a small brush.                                                                                                                                                              |
| MRI-scan                | Magnetic Resonance Imaging of different parts of the body, particularly of the head. The MRI-scans lasted between 30 and 60 minutes and were performed without sedation.                                                                      |
| Pulmonary function test | Regular pulmonary function test that lasted between 15 and 30 minutes.                                                                                                                                                                        |
| Skin prick test         | Children were tested for 20 allergens. A droplet of each allergen was placed on the inner forearm and penetrated through to the skin using a specially modified lancet.                                                                       |
| Ultrasound imaging      | Ultrasound imaging used for research purposes was an echocardiogram. For clinical care purposes, ultrasound imaging was particularly an echocardiography and in some cases ultrasounds were made of the lymph nodes, the head or the abdomen. |
| Venepuncture            | One to three 10ml tubes of blood were collected. In one of the two studies children could choose to have EMLA-cream applied before the venepuncture. None of the children had a local anaesthetic.                                            |
| Dental check-up         | During the dental check-up a general check was carried out, dental plaque was removed and children were given instructions on how to brush their teeth correctly. A new appointment was made for dental caries or other abnormalities.        |



Table 2. Demographics

| Demographics                                  | Research<br>(N=307) | Dentist<br>(N=50) | Total<br>(N=357) |
|-----------------------------------------------|---------------------|-------------------|------------------|
| <b>Gender (%)</b>                             |                     |                   |                  |
| Boy                                           | 158 (51.5%)         | 27 (54%)          | 185 (51.8%)      |
| Girl                                          | 149 (48.5%)         | 23 (46%)          | 172 (48.2%)      |
| <b>Age (%)</b>                                |                     |                   |                  |
| Mean ± SD                                     | 10.5 ± 1.8          | 10.8 ± 1.5        | 10.6 ± 1.7       |
| < 12 years                                    | 273 (88.9%)         | 38 (76%)          | 311 (87.1%)      |
| ≥ 12 years                                    | 34 (11.1%)          | 12 (24%)          | 46 (12.9%)       |
| <b>Procedure (%)</b>                          |                     |                   |                  |
| Buccal Swab                                   | 25 (8.1%)           | -                 | 25 (7.0%)        |
| MRI                                           | 89 (29.0%)          | -                 | 89 (24.9%)       |
| Pulmonary function test                       | 9 (2.9%)            | -                 | 9 (2.5%)         |
| Skin prick test                               | 75 (24.4%)          | -                 | 75 (21.0%)       |
| Ultrasound imaging                            | 77 (25.1%)          | -                 | 77 (21.6%)       |
| Venepuncture                                  | 32 (10.4%)          | -                 | 32 (9.0%)        |
| Check-up visit at dentist                     | -                   | 50 (100%)         | 50 (14.0%)       |
| <b>Medical condition (%)</b>                  |                     |                   |                  |
| ADHD/ADD                                      | 4 (1.3%)            | -                 | 4 (1.1%)         |
| Cystic Fibrosis                               | 6 (2.0%)            | -                 | 6 (1.7%)         |
| Healthy (i.e. no known illness)               | 254 (82.7%)         | 50 (100%)         | 304 (85.2%)      |
| Inflammatory Bowel Disease                    | 36 (11.7%)          | -                 | 36 (10.1%)       |
| Oncological condition                         | 1 (0.3%)            | -                 | 1 (0.3%)         |
| Primary ciliary dyskinesia                    | 4 (1.3%)            | -                 | 4 (1.1%)         |
| Other condition                               | 2 (0.7%)            | -                 | 2 (0.6%)         |
| <b>Previous experience with procedure (%)</b> | 148 (48.2%)         | 50 (100%)         | 198 (55.5%)      |
| <b>Trait-anxiety - STAI-C*</b>                |                     |                   |                  |
|                                               | <b>N=82</b>         | <b>N=36</b>       | <b>N=118</b>     |
| Mean ± SD                                     | 29.3 ± 5.7          | 28.9 ± 5.7        | 29.2 ± 5.9       |
| Range                                         | 20-44               | 22-42             | 20-44            |
| <b>Trait-anxiety - CBCL*</b>                  |                     |                   |                  |
|                                               | <b>N=192</b>        | <b>N=0</b>        | <b>N=192</b>     |
| Mean ± SD                                     | 1.0 ± 1.4           | -                 | 1.0 ± 1.4        |
| Range                                         | 0-6                 | -                 | 0-6              |

\* STAI-C = State Trait Anxiety Inventory for Children      CBCL = Child Behaviour Check List

**Table 3.** Discomfort from child's perspective*Example. "Were you bored while undergoing the MRI-scan?"*

1 = not  
 2 = slightly  
 3 = somewhat  
 4 = very  
 5 = extremely

|                         | Nervous |      | Annoyed |      | Pain |      | Frightened |      | Bored |      | Tired |      | Average discomfort score |       |
|-------------------------|---------|------|---------|------|------|------|------------|------|-------|------|-------|------|--------------------------|-------|
|                         | Mean    | 4+5* | Mean    | 4+5* | Mean | 4+5* | Mean       | 4+5* | Mean  | 4+5* | Mean  | 4+5* | Mean                     | 4+5** |
| <b>Research</b>         |         |      |         |      |      |      |            |      |       |      |       |      |                          |       |
| Buccal swab             | 1.1     | 0    | 1.2     | 0    | 1.0  | 0    | 1.1        | 0    | 2.2   | 12   | 1.0   | 0    | 1.3                      | 12    |
| MRI                     | 1.8     | 5    | 1.4     | 1    | 1.1  | 0    | 1.3        | 0    | 1.7   | 5    | 2.3   | 19   | 1.6                      | 21    |
| Pulmonary function test | 1.2     | 0    | 2.1     | 11   | 1.2  | 0    | 1.0        | 0    | 2.6   | 22   | 2.4   | 11   | 1.8                      | 33    |
| Skin prick test         | 1.6     | 3    | 1.4     | 1    | 1.3  | 0    | 1.2        | 0    | 1.3   | 1    | 1.3   | 1    | 1.3                      | 7     |
| Ultrasound imaging      | 1.5     | 5    | 1.4     | 3    | 1.1  | 0    | 1.2        | 0    | 1.7   | 7    | 1.2   | 1    | 1.4                      | 14    |
| Venepuncture            | 1.9     | 6    | 2.1     | 6    | 1.9  | 0    | 1.5        | 6    | 1.8   | 3    | 1.3   | 0    | 1.7                      | 9     |
| <b>Dentist check-up</b> | 1.6     | 0    | 1.6     | 6    | 1.4  | 0    | 1.2        | 2    | 2.0   | 8    | 1.5   | 2    | 1.6                      | 10    |

\* Percentage of children that answered 'very' or 'extremely' on a question

\*\* On at least one discomfoting aspect

**Table 4.** Suggestions to reduce discomforts

| <b>Suggestion</b>             | <b>Number of children</b> | <b>Percentage (%)</b> |
|-------------------------------|---------------------------|-----------------------|
| (Distraction total)           | (192)                     | (62.6)                |
| - Movie                       | 185                       | 60.3                  |
| - Music                       | 1                         | 0.3                   |
| - Small talk                  | 2                         | 0.7                   |
| - Other form of distraction   | 4                         | 1.3                   |
| Less noise (MRI)              | 24                        | 7.8                   |
| Fewer physical sensations     | 11                        | 3.6                   |
| Warm gel (echoscope)          | 4                         | 1.3                   |
| Warmer room temperature (MRI) | 3                         | 1.0                   |
| Shorter duration              | 1                         | 0.3                   |
| Receiving present             | 1                         | 0.3                   |
| Other                         | 11                        | 3.6                   |
| No suggestion                 | 60                        | 19.5                  |
| <b>Total</b>                  | <b>307*</b>               | <b>100.0</b>          |

\* Only children in clinical research

## **AUTHORS' CONTRIBUTIONS**

MS conceptualized and designed this study, carried out the data collection, drafted the initial manuscript, and approved the final manuscript as submitted. JH, JP, and HG conceptualized and designed this study, supervised the study, reviewed and revised the manuscript, and approved the final manuscript as submitted. RT assisted with the statistical analyses of the data, reviewed and revised the manuscript, and approved the final manuscript as submitted. SV and JB conceptualized and designed this study, reviewed and revised the manuscript, and approved the final manuscript as submitted. MAB, MB, IB, KD, EH, VJ, KJ, JJ, AK, MK, JO, MP, LR, LdR, GHT, HT assisted with acquisition of data, reviewed and revised the manuscript, and approved the final manuscript as submitted.

## **FUNDING**

This work was supported by ZonMw (The Netherlands Organization for Health Research and Development), grant number 113203202.

## **COMPETING INTERESTS**

The authors declare that they have no competing interests.

## **DATA SHARING STATEMENT**

The dataset is available by contacting the corresponding author.

## Appendix A. Children's Discomfort during Research Procedures Questionnaire (CDRPQ)

1. Were you nervous while undergoing procedure X?
  - I was **not** nervous
  - I was **slightly** nervous
  - I was **somewhat** nervous
  - I was **very** nervous
  - I was **extremely** nervous
  
2. Was procedure X annoying?
  - Procedure X was **not** annoying
  - Procedure X was **slightly** annoying
  - Procedure X was **somewhat** annoying
  - Procedure X was **very** annoying
  - Procedure X was **extremely** annoying
  
3. Was procedure X painful?
  - Procedure X was **not** painful
  - Procedure X was **slightly** painful
  - Procedure X was **somewhat** painful
  - Procedure X was **very** painful
  - Procedure X was **extremely** painful
  
4. Were you frightened while undergoing procedure X?
  - I was **not** frightened
  - I was **slightly** frightened
  - I was **somewhat** frightened
  - I was **very** frightened
  - I was **extremely** frightened
  
5. Were you bored while undergoing procedure X?
  - I was **not** bored
  - I was **slightly** bored
  - I was **somewhat** bored
  - I was **very** bored
  - I was **extremely** bored
  
6. Did you find procedure X tiring?
  - It was **not** tiring
  - It was **slightly** tiring
  - It was **somewhat** tiring
  - It was **very** tiring
  - It was **extremely** tiring
  
7. Do you have any suggestions for making procedure X **less discomforting**?

## STROBE Statement—checklist of items that should be included in reports of observational studies

|                              | Item No | Recommendation                                                                                                                                                                                                                                                                                                                                                                                                                                                         | Check                                                                                                                                                    |
|------------------------------|---------|------------------------------------------------------------------------------------------------------------------------------------------------------------------------------------------------------------------------------------------------------------------------------------------------------------------------------------------------------------------------------------------------------------------------------------------------------------------------|----------------------------------------------------------------------------------------------------------------------------------------------------------|
| Title and abstract           | 1       | (a) Indicate the study's design with a commonly used term in the title or the abstract                                                                                                                                                                                                                                                                                                                                                                                 | Yes                                                                                                                                                      |
|                              |         | (b) Provide in the abstract an informative and balanced summary of what was done and what was found                                                                                                                                                                                                                                                                                                                                                                    | Yes                                                                                                                                                      |
| <b>Introduction</b>          |         |                                                                                                                                                                                                                                                                                                                                                                                                                                                                        |                                                                                                                                                          |
| Background/rationale         | 2       | Explain the scientific background and rationale for the investigation being reported                                                                                                                                                                                                                                                                                                                                                                                   | Yes                                                                                                                                                      |
| Objectives                   | 3       | State specific objectives, including any prespecified hypotheses                                                                                                                                                                                                                                                                                                                                                                                                       | Yes                                                                                                                                                      |
| <b>Methods</b>               |         |                                                                                                                                                                                                                                                                                                                                                                                                                                                                        |                                                                                                                                                          |
| Study design                 | 4       | Present key elements of study design early in the paper                                                                                                                                                                                                                                                                                                                                                                                                                | Yes                                                                                                                                                      |
| Setting                      | 5       | Describe the setting, locations, and relevant dates, including periods of recruitment, exposure, follow-up, and data collection                                                                                                                                                                                                                                                                                                                                        | Yes                                                                                                                                                      |
| Participants                 | 6       | (a) <i>Cohort study</i> —Give the eligibility criteria, and the sources and methods of selection of participants. Describe methods of follow-up<br><i>Case-control study</i> —Give the eligibility criteria, and the sources and methods of case ascertainment and control selection. Give the rationale for the choice of cases and controls<br><i>Cross-sectional study</i> —Give the eligibility criteria, and the sources and methods of selection of participants | Yes                                                                                                                                                      |
|                              |         | (b) <i>Cohort study</i> —For matched studies, give matching criteria and number of exposed and unexposed<br><i>Case-control study</i> —For matched studies, give matching criteria and the number of controls per case                                                                                                                                                                                                                                                 | N/A                                                                                                                                                      |
| Variables                    | 7       | Clearly define all outcomes, exposures, predictors, potential confounders, and effect modifiers. Give diagnostic criteria, if applicable                                                                                                                                                                                                                                                                                                                               | Yes                                                                                                                                                      |
| Data sources/<br>measurement | 8*      | For each variable of interest, give sources of data and details of methods of assessment (measurement). Describe comparability of assessment methods if there is more than one group                                                                                                                                                                                                                                                                                   | Yes                                                                                                                                                      |
| Bias                         | 9       | Describe any efforts to address potential sources of bias                                                                                                                                                                                                                                                                                                                                                                                                              | Yes. In the limitation section, we describe the potential selection bias of our study sample. However, this bias cannot be addressed because children in |

1  
2  
3  
4  
5  
6  
7  
8  
9  
10  
11  
12  
13  
14  
15  
16  
17  
18  
19  
20  
21  
22  
23  
24  
25  
26  
27  
28  
29  
30  
31  
32  
33  
34  
35  
36  
37  
38  
39  
40  
41  
42  
43  
44  
45  
46  
47  
48  
49

|                        |     |                                                                                                                                                                                                                                                                                                           |                                                                                                     |
|------------------------|-----|-----------------------------------------------------------------------------------------------------------------------------------------------------------------------------------------------------------------------------------------------------------------------------------------------------------|-----------------------------------------------------------------------------------------------------|
|                        |     |                                                                                                                                                                                                                                                                                                           | clinical research are already a biased group (i.e. they gave assent for participating in research). |
| Study size             | 10  | Explain how the study size was arrived at                                                                                                                                                                                                                                                                 | Yes                                                                                                 |
| Quantitative variables | 11  | Explain how quantitative variables were handled in the analyses. If applicable, describe which groupings were chosen and why                                                                                                                                                                              | Yes                                                                                                 |
| Statistical methods    | 12  | (a) Describe all statistical methods, including those used to control for confounding                                                                                                                                                                                                                     | Yes                                                                                                 |
|                        |     | (b) Describe any methods used to examine subgroups and interactions                                                                                                                                                                                                                                       | Yes                                                                                                 |
|                        |     | (c) Explain how missing data were addressed                                                                                                                                                                                                                                                               | N/A                                                                                                 |
|                        |     | (d) <i>Cohort study</i> —If applicable, explain how loss to follow-up was addressed<br><i>Case-control study</i> —If applicable, explain how matching of cases and controls was addressed<br><i>Cross-sectional study</i> —If applicable, describe analytical methods taking account of sampling strategy | N/A → we used a convenience sample                                                                  |
|                        |     | (e) Describe any sensitivity analyses                                                                                                                                                                                                                                                                     | N/A                                                                                                 |
| <b>Results</b>         |     |                                                                                                                                                                                                                                                                                                           | Yes                                                                                                 |
| Participants           | 13* | (a) Report numbers of individuals at each stage of study—eg numbers potentially eligible, examined for eligibility, confirmed eligible, included in the study, completing follow-up, and analysed                                                                                                         |                                                                                                     |
|                        |     | (b) Give reasons for non-participation at each stage                                                                                                                                                                                                                                                      | Yes                                                                                                 |
|                        |     | (c) Consider use of a flow diagram                                                                                                                                                                                                                                                                        | No                                                                                                  |
| Descriptive data       | 14* | (a) Give characteristics of study participants (eg demographic, clinical, social) and information on exposures and potential confounders                                                                                                                                                                  | Yes                                                                                                 |
|                        |     | (b) Indicate number of participants with missing data for each variable of interest                                                                                                                                                                                                                       | Yes                                                                                                 |
|                        |     | (c) <i>Cohort study</i> —Summarise follow-up time (eg, average and total amount)                                                                                                                                                                                                                          | N/A                                                                                                 |
| Outcome data           | 15* | <i>Cohort study</i> —Report numbers of outcome events or summary measures over time                                                                                                                                                                                                                       | N/A                                                                                                 |
|                        |     | <i>Case-control study</i> —Report numbers in each exposure category, or summary measures of exposure                                                                                                                                                                                                      | N/A                                                                                                 |
|                        |     | <i>Cross-sectional study</i> —Report numbers of outcome events or summary measures                                                                                                                                                                                                                        | Yes                                                                                                 |
| Main results           | 16  | (a) Give unadjusted estimates and, if applicable, confounder-adjusted estimates and their precision (eg, 95% confidence interval). Make clear which confounders were adjusted for and why they were included                                                                                              | Yes                                                                                                 |
|                        |     | (b) Report category boundaries when continuous variables were categorized                                                                                                                                                                                                                                 | N/A                                                                                                 |

|                          |    |                                                                                                                                                                            |     |
|--------------------------|----|----------------------------------------------------------------------------------------------------------------------------------------------------------------------------|-----|
|                          |    | (c) If relevant, consider translating estimates of relative risk into absolute risk for a meaningful time period                                                           | N/A |
| Other analyses           | 17 | Report other analyses done—eg analyses of subgroups and interactions, and sensitivity analyses                                                                             | Yes |
| <b>Discussion</b>        |    |                                                                                                                                                                            |     |
| Key results              | 18 | Summarise key results with reference to study objectives                                                                                                                   | Yes |
| Limitations              | 19 | Discuss limitations of the study, taking into account sources of potential bias or imprecision. Discuss both direction and magnitude of any potential bias                 | Yes |
| Interpretation           | 20 | Give a cautious overall interpretation of results considering objectives, limitations, multiplicity of analyses, results from similar studies, and other relevant evidence | Yes |
| Generalisability         | 21 | Discuss the generalisability (external validity) of the study results                                                                                                      | Yes |
| <b>Other information</b> |    |                                                                                                                                                                            |     |
| Funding                  | 22 | Give the source of funding and the role of the funders for the present study and, if applicable, for the original study on which the present article is based              | Yes |

\*Give information separately for cases and controls in case-control studies and, if applicable, for exposed and unexposed groups in cohort and cross-sectional studies.

**Note:** An Explanation and Elaboration article discusses each checklist item and gives methodological background and published examples of transparent reporting. The STROBE checklist is best used in conjunction with this article (freely available on the Web sites of PLoS Medicine at <http://www.plosmedicine.org/>, Annals of Internal Medicine at <http://www.annals.org/>, and Epidemiology at <http://www.epidem.com/>). Information on the STROBE Initiative is available at [www.strobe-statement.org](http://www.strobe-statement.org).



# BMJ Open

## The child's perspective on discomfort during medical research procedures: a descriptive study

|                                 |                                                                                                                                                                                                                                                                                                                                                                                                                                                                                                                                                                                                                                                                                                                                                                                                                                                                                                                                                                                                                                                                                                                                                                                                                                                                                                                                                                                                                                                                                                                                                                                                                                                                                                                                                                                                                                                                                                                                                                                                                                                                                    |
|---------------------------------|------------------------------------------------------------------------------------------------------------------------------------------------------------------------------------------------------------------------------------------------------------------------------------------------------------------------------------------------------------------------------------------------------------------------------------------------------------------------------------------------------------------------------------------------------------------------------------------------------------------------------------------------------------------------------------------------------------------------------------------------------------------------------------------------------------------------------------------------------------------------------------------------------------------------------------------------------------------------------------------------------------------------------------------------------------------------------------------------------------------------------------------------------------------------------------------------------------------------------------------------------------------------------------------------------------------------------------------------------------------------------------------------------------------------------------------------------------------------------------------------------------------------------------------------------------------------------------------------------------------------------------------------------------------------------------------------------------------------------------------------------------------------------------------------------------------------------------------------------------------------------------------------------------------------------------------------------------------------------------------------------------------------------------------------------------------------------------|
| Journal:                        | <i>BMJ Open</i>                                                                                                                                                                                                                                                                                                                                                                                                                                                                                                                                                                                                                                                                                                                                                                                                                                                                                                                                                                                                                                                                                                                                                                                                                                                                                                                                                                                                                                                                                                                                                                                                                                                                                                                                                                                                                                                                                                                                                                                                                                                                    |
| Manuscript ID                   | bmjopen-2017-016077.R1                                                                                                                                                                                                                                                                                                                                                                                                                                                                                                                                                                                                                                                                                                                                                                                                                                                                                                                                                                                                                                                                                                                                                                                                                                                                                                                                                                                                                                                                                                                                                                                                                                                                                                                                                                                                                                                                                                                                                                                                                                                             |
| Article Type:                   | Research                                                                                                                                                                                                                                                                                                                                                                                                                                                                                                                                                                                                                                                                                                                                                                                                                                                                                                                                                                                                                                                                                                                                                                                                                                                                                                                                                                                                                                                                                                                                                                                                                                                                                                                                                                                                                                                                                                                                                                                                                                                                           |
| Date Submitted by the Author:   | 23-May-2017                                                                                                                                                                                                                                                                                                                                                                                                                                                                                                                                                                                                                                                                                                                                                                                                                                                                                                                                                                                                                                                                                                                                                                                                                                                                                                                                                                                                                                                                                                                                                                                                                                                                                                                                                                                                                                                                                                                                                                                                                                                                        |
| Complete List of Authors:       | <p>Staphorst, Mira; Erasmus University Medical Center, Psychiatry, section Medical Psychology and Psychotherapy; Emma Kinderziekenhuis AMC, Paediatrics</p> <p>Benninga, Marc; Emma Kinderziekenhuis AMC, Pediatrics</p> <p>Bisschoff, Margriet; Erasmus University Medical Center, Pediatrics and Child Psychiatry</p> <p>Bon, Irma; VU University Medical Center (VUmc), Pediatrics</p> <p>Busschbach, Jan; Erasmus University Medical Center, Psychiatry, section Medical Psychology and Psychotherapy</p> <p>Diederens, Kay; Emma Kinderziekenhuis AMC, Pediatrics</p> <p>van Goudoever, Johannes; VU University Medical Center (VUmc), Pediatrics; Emma Kinderziekenhuis AMC</p> <p>Haarman, Eric; VU University Medical Center (VUmc), Pediatrics</p> <p>Hunfeld, Joke; Erasmus University Medical Center, Psychiatry, section Medical Psychology and Psychotherapy</p> <p>Jaddoe, Vincent; Erasmus University Medical Center, Pediatrics and Child Psychiatry</p> <p>de Jong, Karin; Academic Center Dentistry Amsterdam (ACTA), Pedodontology</p> <p>de Jongste, Johan; Erasmus University Medical Center, Pediatrics and Child Psychiatry</p> <p>Kindermann, Angelika; Emma Kinderziekenhuis AMC, Pediatrics</p> <p>Königs, Marsh; VU University, Section of Clinical Neuropsychology</p> <p>Oosterlaan, Jaap; VU University, Section of Clinical Neuropsychology</p> <p>Passchier, Jan; VU University, Clinical Psychology/EMGO+</p> <p>Pijnenburg, Marielle; Erasmus University Medical Center, Pediatrics and Child Psychiatry</p> <p>Renemna, Liesbeth; Emma Kinderziekenhuis AMC, Pediatrics</p> <p>de Ridder, Lissy; Erasmus University Medical Center, Pediatrics and Child Psychiatry</p> <p>Tamminga, Hyke; Emma Kinderziekenhuis AMC, Pediatrics</p> <p>Tiemeier, Henning; Erasmus University Medical Center, Pediatrics and Child Psychiatry</p> <p>Timman, Reinier; Erasmus University Medical Center, Psychiatry, section Medical Psychology and Psychotherapy</p> <p>van de Vathorst, Suzanne; Erasmus University Medical Center, Ethics and Philosophy</p> |
| <b>Primary Subject Heading</b>: | Paediatrics                                                                                                                                                                                                                                                                                                                                                                                                                                                                                                                                                                                                                                                                                                                                                                                                                                                                                                                                                                                                                                                                                                                                                                                                                                                                                                                                                                                                                                                                                                                                                                                                                                                                                                                                                                                                                                                                                                                                                                                                                                                                        |
| Secondary Subject Heading:      | Ethics, Evidence based practice                                                                                                                                                                                                                                                                                                                                                                                                                                                                                                                                                                                                                                                                                                                                                                                                                                                                                                                                                                                                                                                                                                                                                                                                                                                                                                                                                                                                                                                                                                                                                                                                                                                                                                                                                                                                                                                                                                                                                                                                                                                    |

1  
2  
3  
4  
5  
6  
7  
8  
9  
10  
11  
12  
13  
14  
15  
16  
17  
18  
19  
20  
21  
22  
23  
24  
25  
26  
27  
28  
29  
30  
31  
32  
33  
34  
35  
36  
37  
38  
39  
40  
41  
42  
43  
44  
45  
46  
47  
48  
49  
50  
51  
52  
53  
54  
55  
56  
57  
58  
59  
60

|           |                                                          |
|-----------|----------------------------------------------------------|
| Keywords: | ETHICS (see Medical Ethics), MEDICAL ETHICS, PAEDIATRICS |
|           |                                                          |

SCHOLARONE™  
Manuscripts

For peer review only

1  
2  
3 **The child's perspective on discomfort during medical research procedures: a descriptive**  
4 **study**  
5  
6  
7  
8  
9

10 Mira S. Staphorst<sup>1,2</sup> on behalf of the BURDEN-group  
11  
12  
13

14  
15 **The BURDEN-group:**  
16

17 Marc A. Benninga<sup>2</sup>, Margriet Bisschoff<sup>3</sup>, Irma Bon<sup>4</sup>, Jan J.V. Busschbach<sup>1</sup>, Kay Diederens<sup>2</sup>,  
18 Johannes B. van Goudoever<sup>2,4</sup>, Eric G. Haarman<sup>4</sup>, Joke A.M. Hunfeld<sup>1</sup>, Vincent V.W. Jaddoe<sup>3</sup>,  
19 Karin J.M. de Jong<sup>5</sup>, Johan C. de Jongste<sup>3</sup>, Angelika Kindermann<sup>2</sup>, Marsh Königs<sup>6</sup>, Jaap  
20 Oosterlaan<sup>6</sup>, Jan Passchier<sup>7</sup>, Mariëlle W. Pijnenburg<sup>3</sup>, Liesbeth Reneman<sup>2</sup>, Lissy de Ridder<sup>3</sup>,  
21 Hyke G. Tamminga<sup>2</sup>, Henning W. Tiemeier<sup>3</sup>, Reinier Timman<sup>1</sup>, Suzanne van de Vathorst<sup>8</sup>  
22  
23  
24  
25  
26  
27  
28  
29  
30  
31

32 **Affiliations**  
33

34 <sup>1</sup> Department of Psychiatry, section Medical Psychology and Psychotherapy, Erasmus University  
35 Medical Center, Rotterdam, the Netherlands  
36  
37

38 <sup>2</sup> Department of Pediatrics, Emma Children's Hospital, Academic Medical Center (AMC),  
39 Amsterdam, the Netherlands  
40  
41  
42

43 <sup>3</sup> Departments of Pediatrics and Child Psychiatry, Sophia Children's Hospital, Erasmus  
44 University Medical Center, Rotterdam, the Netherlands  
45  
46  
47

48 <sup>4</sup> Department of Pediatrics, VU University Medical Center (VUmc), Amsterdam, the Netherlands  
49

50 <sup>5</sup> Department of Pedodontology, Academic Center Dentistry Amsterdam (ACTA), Amsterdam,  
51 the Netherlands  
52  
53  
54

55 <sup>6</sup> Section of Clinical Neuropsychology, VU University, Amsterdam, the Netherlands  
56  
57  
58  
59  
60

1  
2  
3 <sup>7</sup>Department of Clinical Psychology/EMGO+, VU University, Amsterdam, the Netherlands

4  
5 <sup>8</sup>Department of Ethics and Philosophy, Erasmus University Medical Center, Rotterdam, the  
6  
7  
8 Netherlands

9  
10  
11  
12 **Corresponding author**

13  
14 Mira S. Staphorst, MSc.

15  
16  
17 Department of Psychiatry, section Medical Psychology and Psychotherapy

18  
19 Erasmus University Medical Centre

20  
21 PO box 2040

22  
23  
24 3000 CA Rotterdam

25  
26 the Netherlands

27  
28  
29 Phone: +31 10 7038336

30  
31 Email: mstaphorst@gmail.com

32  
33  
34  
35  
36 **Keywords:** child; discomfort; ethics; research participation; self report

37  
38  
39  
40  
41 **Word count:** 3352 words

## ABSTRACT

**Objective:** the evaluation of discomfort in paediatric research is scarcely evidence-based. In this study, we make a start in describing children's self-reported discomfort during common medical research procedures and compare this with discomfort during dental check-ups which can be considered as a reference level of a 'minimal discomfort' medical procedure. We exploratory study whether there are associations between age, anxiety-proneness, gender, medical condition, previous experiences and discomfort. We also describe children's suggestions for reducing discomfort.

**Design:** cross-sectional descriptive study.

**Setting:** paediatric research at three academic hospitals.

**Patients:** 357 children with and without illnesses (8-18 years, mean=10.6 years) were enrolled: 307 from paediatric research studies and 50 from dental care.

**Main outcome measures:** we measured various generic forms of discomfort (nervousness, annoyance, pain, fright, boredom, tiredness) due to six common research procedures: buccal swabs, MRI-scans, pulmonary function tests, skin prick tests, ultrasound imaging and venepunctures.

**Results:** most children reported limited discomfort during the research procedures (means: 1.0-2.6 on a scale from 1-5). Compared with dental check-ups, buccal swab tests, skin prick tests and ultrasound imaging were less discomforting, while MRI-scans, venepunctures and pulmonary function tests caused a similar degree of discomfort. 60.3% of the children suggested providing distraction by showing movies to reduce discomfort. The exploratory analyses suggested a positive association between anxiety-proneness and discomfort.

1  
2  
3 **Conclusions:** the findings of this study support the acceptability of participation of children in  
4 the studied research procedures, which stimulates evidence-based research practice. Furthermore,  
5  
6 the present study can be considered as a first step in providing benchmarks for discomfort of  
7  
8 procedures in paediatric research.  
9  
10  
11  
12  
13  
14  
15  
16  
17  
18  
19  
20  
21  
22  
23  
24  
25  
26  
27  
28  
29  
30  
31  
32  
33  
34  
35  
36  
37  
38  
39  
40  
41  
42  
43  
44  
45  
46  
47  
48  
49  
50  
51  
52  
53  
54  
55  
56  
57  
58  
59  
60

For peer review only

### Strengths and limitations of this study

- This is the first large-scale study on children's discomfort of research procedures.
- The findings of this study support the acceptability of participation of children in the studied research procedures, which stimulates evidence-based research practice.
- This study can help to establish benchmarks for discomfort of research procedures in paediatric research.
- We included a limited number of children for measuring discomfort, of which most were healthy 11-year-olds. For generalizability, future research should include larger numbers and more heterogeneous groups of children.
- Although this study gives insight into the degree of discomfort, it needs to be established whether these degrees correspond with the concepts of 'minimal discomfort', a 'minor increase over minimal discomfort', or 'more than minimal discomfort' that IRBs use in their evaluation of research protocols.
- A limitation of this study is the cross-sectional design for comparing discomfort during research procedures and dental check-ups. A design with paired measurements from the same child might have given a more accurate reference level (dental check-up) of discomfort.

## INTRODUCTION

There is a need to improve treatments and licensed medication for children by conducting paediatric research.[1] For instance, it is estimated that 25 to 65% of all prescribed paediatric drugs are used off-label,[2] which exposes children to an increased risk of medication under- or overdose. Paediatric research, however, is complicated by the obligation to protect children against the risks and discomfort of research procedures. It is the responsibility of Institutional Review Boards (IRBs) to estimate the risks and discomfort of research procedures, and evaluate whether these are acceptable for the children. Primarily in case of discomfort, IRBs base this evaluation on their intuition and experiences, which may not necessarily give a representative view of children's experiences.[3-6] Consequently, this can lead to the rejection of studies when discomfort is expected to be excessive, and vice versa. Preferably, the estimation of discomfort is based on group-level data of children's discomfort during research procedures, but unfortunately, these data are scarce. In this study we therefore make a start in describing children's self-reported discomfort during research procedures. These data are an important first step in providing an empirical basis for the evaluation by IRBs and eventually providing benchmarks for the level of discomfort that might be expected for children with a given procedure.

We measured discomfort during research *procedures* instead of during a research study *as a whole* to make the results generalizable to children who undergo these procedures in future research and because IRBs often evaluate the research procedures of a study separately.[7-9] By addressing research procedures, this study provides a crucial complement to previous studies that have measured children's overall reactions to participation in research studies, such as the understanding of your rights of being a research participant.[10-13] We compared the outcomes to discomfort of children during routine dental check-ups. In several countries, like the United



1  
2  
3 States, IRBs have to establish whether discomfort of paediatric research activities is minimal in  
4 relation to children's 'daily life' activities or medical/psychological routine examinations that are  
5 regarded as minimal discomfort. Therefore, we compared discomfort in research to dental check-  
6 ups because regular dental check-ups are medical routine examinations that all children in our  
7 country encounter approximately twice a year (Note: dental check-ups for children 0-18 years  
8 are covered by basic health insurance). In this way, the dental check-ups could function as a  
9 'reference level' of minimal discomfort. Furthermore, we exploratory studied whether there is an  
10 association between age, anxiety-proneness, gender, medical condition and previous experiences  
11 with the procedure, and children's discomfort. It is known that most of these factors are  
12 important for IRBs to consider when they estimate the discomfort of research procedures for the  
13 children. In addition, children were asked for suggestions to reduce discomfort.  
14  
15  
16  
17  
18  
19  
20  
21  
22  
23  
24  
25  
26  
27  
28  
29  
30

## 31 **MATERIALS AND METHODS**

### 32 **Participants**

33  
34 We used a convenience sample in which we aimed to include 50 children for each research  
35 procedure, or as much we could enrol within the timeframe of our study.[14] Due to the  
36 exploratory nature of our study and the absence of previous data using the CDRPQ on which to  
37 base the calculations, it was not possible to calculate a sample size needed for our study or to do  
38 a valid power analysis. The number of 50 children is an educated guess, based on the duration of  
39 our study and the availability of children undergoing the research procedure at the different  
40 locations during the inclusion period of our study. Children were eligible to participate if they  
41 met the following criteria: a) aged between 8-18 years, b) fluent in Dutch, c) no current  
42 psychological treatment for pain or anxiety disorders, d) no psychosocial problems as diagnosed  
43  
44  
45  
46  
47  
48  
49  
50  
51  
52  
53  
54  
55  
56  
57  
58  
59  
60

1  
2  
3 in the Diagnostic and Statistical Manual of Mental Disorders at the time of enrolment, and e)  
4  
5 accompanied by a parent or caretaker. This information was determined by consultation of  
6  
7 parent(s) or the child's medical record.  
8  
9

10 The children were recruited from research studies being conducted at three academic  
11  
12 hospitals in the Netherlands. In addition, children without a known illness who had had a check-  
13  
14 up visit to the dentist were included. The same inclusion criteria were applied to this group.  
15  
16 Children were enrolled between March 2014 and June 2015.  
17  
18  
19  
20  
21

## 22 **Procedure**

23  
24 First, the researchers conducting the research studies approached children and their parents if  
25  
26 they were willing to participate in our study. Interested children and parents were provided with  
27  
28 more information about the study by the first author or a research assistant. After agreement,  
29  
30 written consent from parents and written child assent (>12 years) were obtained. Children  
31  
32 younger than twelve gave oral assent to participate. Directly after the research procedure, the  
33  
34 children completed two questionnaires on an iPad mini tablet to measure discomfort and anxiety-  
35  
36 proneness. We asked the children directly after they underwent the medical procedure because  
37  
38 we thought this would correspond to the 'highest' level of discomfort for the children. From  
39  
40 other research areas (for example pain research) we know that measures that are as close as  
41  
42 possible to the event are considered to be more valid than delayed retrospective measures which  
43  
44 bear the risk of recall bias. Parents provided demographic information. All children received a  
45  
46 gift card (€7.50) after completing the questionnaires.  
47  
48  
49  
50  
51  
52  
53  
54  
55  
56  
57  
58  
59  
60

## Instruments

### Discomfort

We developed the Children's Discomfort during Research Procedures Questionnaire (CDRPQ) because no appropriate instrument existed for the aim of the current study.[15] Instruments that measure children's self-reported experiences in medical situations often focus on the measurement of pain, distress or anxiety. Discomfort - which is mentioned as an important assessment criterion for research participation in most ethics guidelines and regulations - also involves other aspects than pain, distress and anxiety, as was shown in an interview study we conducted about the face-validity of discomfort from the child's perspective.[16] Measuring various forms of discomfort therefore provides a more thorough measure of the child's discomfort than only focusing on anxiety or pain. We aimed for an instrument that measures forms of discomfort that are applicable to all kinds of research procedures. Therefore the CDRPQ can be considered as a generic questionnaire.

The CDRPQ contains: 1) six questions about generic types of discomfort (nervousness, annoyance, pain, fright, boredom, and tiredness), which are measured using Likert scales ranging from 1='not discomforting' to 5='extremely discomforting', and 2) one open question about suggestions for reducing discomfort (Appendix A. Note: the CDRPQ was developed in Dutch and then translated to English for this manuscript). Validity and test-retest reliability were acceptable.[15]

### Anxiety-proneness

Anxiety-proneness was measured using the Dutch translation of the trait scale of the State-Trait Anxiety Inventory for Children (STAI-C),[17] or the anxiety scale of the Child Behaviour

1  
2  
3 Checklist (CBCL),[17] depending on which questionnaire was already being used by the  
4  
5 participating studies. Previous research shows that there are little differences in measuring  
6  
7 anxiety by the trait scale of the STAI-C and the anxiety scale of the CBCL when parent-  
8  
9 reported,[18] and that these scales are highly correlated ( $r=0.77$ ).[19] The trait scale of the STAI-  
10  
11 C is self-reported and addresses the frequency and intensity of anxiety symptoms in general. It  
12  
13 consists of 20 items (e.g. “*I worry about school*”).[20] The STAI-C trait scale has shown good  
14  
15 internal consistency (Cronbach’s  $\alpha>0.80$ ) and acceptable test–retest reliability ( $r>0.65$ ).[21] The  
16  
17 anxiety scale of the CBCL is parent-reported and includes six questions on anxiety problems  
18  
19 (e.g. “fear of animals, situations or places”). The CBCL has shown good validity and  
20  
21 reliability.[17]  
22  
23  
24  
25  
26  
27  
28

## 29 Demographics

30  
31 Parents provided information on demographics.  
32  
33  
34  
35

## 36 Medical procedures

### 37 Research procedures

38  
39 We measured children’s experiences during six research procedures: buccal swabs, MRI-scans,  
40  
41 pulmonary function tests, skin prick tests, ultrasound imaging and venepunctures (Table 1). The  
42  
43 research procedures were selected based on the following criteria: no general anaesthesia  
44  
45 necessary, perceived by a consulted group of paediatric healthcare professionals as possibly  
46  
47 causing discomfort, and performed in the participating hospitals during the timeframe of our  
48  
49 study. Almost all children underwent the research procedures for non-therapeutic research  
50  
51 purposes; the pulmonary function tests and some venepunctures were performed as part of  
52  
53  
54  
55  
56  
57  
58  
59  
60

1  
2  
3 therapeutic research studies.  
4  
5  
6  
7

8 Dentist  
9

10 We measured the experiences of a group of children without a known illness during regular  
11 check-up visits to a general academic dental centre (Table 1). Fifth-year dentistry students  
12 performed supervised dental check-ups on children at this academic dental centre.  
13  
14  
15  
16  
17  
18  
19

### 20 **Data analysis**

21  
22 The data were analysed using SPSS version 21. For each procedure, we calculated the means of  
23 the different forms of discomfort, the percentage who reported the research procedure as ‘very’  
24 or ‘extremely’ discomfoting, and an average discomfort score based on the six forms of  
25 discomfort. As most data were skewed, we used non-parametric statistics. A Kruskal-Wallis Test  
26 and Mann-Whitney U tests were used to explore differences between the procedures in the  
27 average discomfort score. We used Spearman correlations to explore the relation between the  
28 average discomfort score, and age and anxiety-proneness. Mann-Whitney U tests were used to  
29 explore differences in the average discomfort score between children with and without an illness,  
30 boys and girls, and children with and without previous experiences. Concerning the suggestions  
31 of the children to reduce discomfort, the first author coded the question ‘What would you suggest  
32 to make [*procedure X*] less annoying?’ into categories. A supervising researcher checked these  
33 categories (JH), and disagreements were discussed until consensus was reached.  
34  
35  
36  
37  
38  
39  
40  
41  
42  
43  
44  
45  
46  
47  
48  
49  
50  
51  
52

### 53 **Ethical approval**

54  
55 The IRB of the VU Medical Centre in Amsterdam (The Netherlands) indicated that there was no  
56  
57  
58  
59  
60

1  
2  
3 risk or discomfort associated with this study (i.e. completing the questionnaires), and stated that  
4  
5 it is exempt from requiring approval under Dutch Law (2014/010).  
6  
7  
8  
9

## 10 RESULTS

### 11 Participants

12  
13 434 children were potentially suitable for participation in our study, of which 38 children (8.8%)  
14  
15 did not meet the inclusion criteria (24 in research and 14 from the dental clinic): two children did  
16  
17 not speak Dutch fluently, five children were not accompanied by a parent and 31 children were  
18  
19 too young or too old. Of the 396 children who were invited to participate, 357 children agreed to  
20  
21 participate (90.2%). The most frequently mentioned reason for declining was lack of time of the  
22  
23 parents (56%), followed by 'no interest' (26%). 307 children were enrolled from clinical  
24  
25 research, and 50 from an academic dental clinic. The majority of the children in research did not  
26  
27 have a known illness (82.7%); their mean age was 10.5 years. Further characteristics of the  
28  
29 children are presented in Table 2.  
30  
31  
32  
33  
34  
35  
36  
37  
38

### 39 Discomfort during research procedures (CDRPQ)

40  
41 Table 3 shows the means and standard deviations of the discomfort children experienced. The  
42  
43 percentages of children's reports on the different levels of discomfort can be found in Appendix  
44  
45 B.  
46  
47

48 The percentages of children who *did not* experience discomfort varied from 21.9% to  
49  
50 100%. Moreover, for three procedures (buccal swab, skin prick testing and ultrasound imaging),  
51  
52 the percentage of children who reported 'no discomfort' was more than 50%. For the children  
53  
54 who *did* experience discomfort, the mean discomfort scores generally were low: most reported  
55  
56  
57  
58  
59  
60

1  
2  
3 'slight' discomfort or sometimes 'somewhat' discomfort. An exception is that 18% of the  
4  
5 children undergoing an MRI-scan experienced this as 'very' or 'extremely' tiring.  
6  
7

8       There were significant differences in discomfort between the procedures ( $p < 0.001$ ).  
9  
10 Compared to check-up visits to the dentist, discomfort of buccal swab tests, skin prick tests and  
11  
12 ultrasound imaging were less discomforting ( $p = 0.002-0.007$ ), while MRI-scans, venepunctures  
13  
14 and pulmonary function tests caused a similar degree of discomfort ( $p = 0.05-0.26$ ).  
15  
16  
17  
18  
19

### 20 **Suggestions to reduce discomfort**

21  
22 A large group of the children in clinical research (62.6%) suggested that distraction during the  
23  
24 research procedures, preferably in the form of a movie, would reduce discomfort (Table 4).  
25  
26  
27  
28

### 29 **Exploring potential relations between discomfort and demographic factors**

30  
31 There was a significant correlation between anxiety-proneness, measured with the STAI-C  
32  
33 ( $p = 0.004$ ), and discomfort. Anxiety-proneness, measured with the CBCL ( $p = 0.09$ ), and  
34  
35 discomfort showed a trend for a correlation between these factors. There was no significant  
36  
37 correlation between age and discomfort ( $p = 0.32$ ). There were no significant differences in  
38  
39 discomfort between healthy children and children with a chronic condition ( $p = 0.78$ ), boys and  
40  
41 girls ( $p = 0.89$ ), and children who had a previous experience or children who underwent the  
42  
43 research procedure for the first time ( $p = 0.31$ ).  
44  
45  
46  
47  
48  
49

## 50 **DISCUSSION**

51  
52 This is the first large-scale study investigating children's self-reported discomfort during  
53  
54 research procedures. It is in line with the trend of actively involving children in expressing their  
55  
56  
57  
58  
59  
60

1  
2  
3 experiences in medical and research situations. Our study shows that a many children did not  
4  
5 experience discomfort during the studied research procedures; and the level of discomfort for the  
6  
7 children who did experience discomfort is limited.  
8  
9

10 Although the studied research procedures may not be the most invasive ones, it is  
11  
12 important to have actual data on the discomfort children experience during these research  
13  
14 procedures rather than making assumptions. Besides, research shows that there are significant  
15  
16 differences in the evaluation of discomfort of some of these research procedures in similar  
17  
18 children (i.e. healthy 11-year-olds) among IRB members,[22, 23] which supports the importance  
19  
20 of self-reported data by children during the evaluation of study protocols.  
21  
22  
23

24 Looking at the different forms of discomfort, it is remarkable that the scores of the  
25  
26 children in our study on being bored and tired are higher than the scores on the other forms of  
27  
28 discomfort. Although a boring or tiring research procedure may not be considered by IRBs as  
29  
30 unacceptable in terms of discomfort, these are important forms of discomfort for children and  
31  
32 can be a reason for them to refuse undergoing this procedure (in the future). For this reason, we  
33  
34 believe it is important that these forms of discomfort are explicitly taken into account when  
35  
36 evaluating discomfort by IRBs.  
37  
38  
39

40 In several ethics codes and guidelines, minimizing discomfort is a requirement for  
41  
42 paediatric research.[24, 25] According to the majority of the children in our study, distraction  
43  
44 can help to achieve this. Distraction is proven to be (cost-)effective in reducing discomfort  
45  
46 during medical procedures in children of all ages.[26-31] While children preferred to be  
47  
48 distracted by movies, during some procedures it may be more feasible to distract children by  
49  
50 providing music, toys, or decoration on walls and ceilings.  
51  
52  
53  
54  
55  
56  
57  
58  
59  
60



## Strengths and limitations

The outcomes of this study can help to establish benchmarks for the discomfort of research procedures in children, and thereby assist IRBs, paediatric researchers, parents and children in their estimation of the acceptability of these procedures for research participation. Other strengths of the study are the multi-site enrolment for generalizability, the large number of children in some of the procedures, the exploratory comparison with a routine medical procedure that is regarded as causing minimal discomfort, the use of a specifically developed questionnaire to measure different forms of discomfort (CDRPQ), and the suggestions for reducing discomfort.

As we were dependent on the participating studies, we were unable to include the intended number of children for some procedures, because fewer children took part in these studies than expected, or were included at a later stage than initially planned. This has reduced the power of the outcomes of some research procedures (e.g. pulmonary function tests). On the other hand, for some procedures more children were included than initially planned (e.g. MRI-scans).

We used different groups of children to compare discomfort in clinical research with dental check-ups. A design with paired measurements from the same child might have given a more accurate reference level of discomfort.

For this study, we aimed to include both healthy and ill children. However, the majority of the participants in our research appeared to be healthy. Therefore the results might not be representative for ill children. However, the explorative analysis to investigate differences in discomfort between healthy and ill children did not show any differences in discomfort.

Furthermore, the degree of discomfort may be relative to the presence of other research procedures the children underwent in the studies. As there was little variation in their ratings of

1  
2  
3 discomfort, we assume that the other research procedures did not have much influence on  
4  
5 children's reports.  
6  
7

8 All children included in our study assented to undergo the research procedures, which is  
9  
10 why our study might be hampered by a selection bias (note: this is applicable to all studies  
11  
12 investigating children's experiences in paediatric research). It may be possible that highly  
13  
14 anxious children declined to undergo the research procedures because of expected discomfort or  
15  
16 anxiousness, or that they may not have been approached to participate for this reason (i.e.  
17  
18 gatekeeping by the researcher/paediatrician).[32] The fact that we did not have to exclude  
19  
20 children with anxiety-disorders (i.e. one of the exclusion criteria) nor that children did have high  
21  
22 scores on the anxiety-proneness measures, supports this. The findings of this study therefore  
23  
24 cannot just be generalized to children in clinical care.  
25  
26  
27  
28  
29  
30  
31

### 32 **Implications and recommendations for those involved in paediatric research**

#### 33 Institutional Review Boards (IRBs)

34  
35 We encourage IRBs to use self-reported data of the children when evaluating discomfort for  
36  
37 reasons mentioned above. To be able to use children's self-reported information on discomfort of  
38  
39 *all* kinds of research procedures and across children from all kinds of backgrounds, it is needed  
40  
41 that these data are collected and disseminated. IRBs can play a key role in this by requiring these  
42  
43 data as part of a study protocol and recommending paediatric researchers to register children's  
44  
45 experiences.  
46  
47  
48  
49  
50  
51  
52

#### 53 Paediatric researchers

54  
55  
56  
57  
58  
59  
60

1  
2  
3 We recommend that paediatric researchers routinely include a brief assessment of the impact of  
4 the research procedures of their studies by asking the participating children, e.g. the CDRPQ,  
5 which we developed for this purpose. To avoid overloading paediatric researchers with extra  
6 work and responsibilities during a study visit, it would be ideal if children can report their  
7 experiences directly on a website/app. As such, paediatric researchers can limit their tasks to  
8 emphasizing the opportunity and importance of reporting these experiences to children (and their  
9 parents) and to refer them to the website/app concerned. Of course, this website/app need to be  
10 developed first.  
11  
12  
13  
14  
15  
16  
17  
18  
19  
20  
21

22 During the informed consent procedure, we encourage researchers providing parents and  
23 children with information on expected discomfort of research procedures based on empirical  
24 data, in order to facilitate their decision-making for participation.  
25  
26  
27  
28

29 It is important that discomfort in paediatric research is reduced as much as possible. This  
30 can be achieved by standard asking children for their suggestions to reduce discomfort, and - if  
31 feasible - to apply these in their studies. As we showed in this study, many children suggested  
32 providing (more) distraction, for instance by showing short movies.  
33  
34  
35  
36  
37  
38  
39  
40

#### 41 Children and parents

42 For children (and parents) who are approached for research participation, it can be helpful when  
43 they have access to information on discomfort of research procedures of children in previous  
44 research. It provides them with additional information on what to expect from undergoing  
45 research procedures from the perspective of their peers. This information can facilitate decision-  
46 making for (parts of) research participation, as they will be better informed. For instance, if the  
47  
48  
49  
50  
51  
52  
53  
54  
55  
56  
57  
58  
59  
60

1  
2  
3 majority of children do not experience a specific research procedure as discomforting, it may be  
4  
5 a reason for others to agree with undergoing this procedure too.  
6  
7

8 The availability of children's self-reported data on discomfort is dependent on the  
9  
10 willingness of children to report on their experiences during research participation. As we  
11  
12 learned from this study, most children are willing to report these experiences as long as it does  
13  
14 not require much extra time.  
15  
16  
17  
18  
19

### 20 **Future research**

21  
22 For generalizability, future research should include larger numbers and more heterogeneous  
23  
24 groups of children, in particular during pulmonary function tests. Future research is also needed  
25  
26 to describe children's discomfort during other (more invasive) research procedures. We therefore  
27  
28 recommend paediatric researchers to include measures in their studies (e.g. CDRPQ) to  
29  
30 investigate discomfort related to the research procedures involved, and also disseminate these  
31  
32 results (note: since March 2017 in the Netherlands an addition to the law on research  
33  
34 participation was implemented which requires to define and monitor discomfort in paediatric  
35  
36 research [[http://www.ccmo.nl/nl/verruiming-mogelijkheden-medisch-wetenschappelijk-  
39  
40 onderzoek-met-minderjarige-en-wilsonbekwame-proefp](http://www.ccmo.nl/nl/verruiming-mogelijkheden-medisch-wetenschappelijk-<br/>37<br/>38 onderzoek-met-minderjarige-en-wilsonbekwame-proefp)].  
41  
42  
43

44 For IRBs and paediatric researchers who evaluate the level of discomfort of (non-  
45  
46 therapeutic) research procedures, it is important to know which research procedures involve  
47  
48 minimal, a minor increase over minimal discomfort, or more than minimal discomfort.  
49

50 Unfortunately, there are no clear guidelines for this. Future research - in which IRBs, paediatric  
51  
52 researchers, children and their parents are consulted - is therefore needed to determine cut-off  
53  
54 levels for this.  
55  
56  
57  
58  
59  
60

## CONCLUSION

Our findings support the acceptability of participation of children in the studied procedures for research purposes because children experienced limited discomfort. The results are an important first step in providing benchmarks for discomfort of research procedures in paediatric research, and contribute to the evidence-based evaluation of discomfort in research.

For peer review only

## REFERENCES

1. Kaplan W, Wirtz V, Mantel-Teeuwisse A, et al. Priority Medicines for Europe and the World 2013 Update. Geneva: World Health Organization in collaboration with Utrecht University and Boston University, 2013.
2. Kimland E, Odland V. Off-label drug use in pediatric patients. *Clin Pharmacol Ther* 2012;91:796-801
3. Chambers CT, Giesbrecht K, Craig KD, et al. A comparison of faces scales for the measurement of pediatric pain: children's and parents' ratings. *Pain* 1999;83:25-35 doi: S030439599900086X [pii]published Online First: Epub Date]].
4. McCarthy AM, Kleiber C, Hanrahan K, et al. Factors explaining children's responses to intravenous needle insertions. *Nurs Res* 2010;59:407-16 doi: 10.1097/NNR.0b013e3181f80ed5published Online First: Epub Date]].
5. Rid A, Emanuel EJ, Wendler D. Evaluating the risks of clinical research. *JAMA* 2010;304:1472-9 doi: 10.1001/jama.2010.1414published Online First: Epub Date]].
6. Romsing J, Moller-Sonnergaard J, Hertel S, et al. Postoperative pain in children: comparison between ratings of children and nurses. *J Pain Symptom Manage* 1996;11:42-6 doi: 0885392495001360 [pii]published Online First: Epub Date]].
7. Weijer C. The ethical analysis of risk in intensive care unit research. *Crit Care* 2004;8:85-6
8. McRae A, Weijer C. U.S. Federal Regulations for emergency research: a practical guide and commentary. *Acad Emerg Med* 2008;15:88-97
9. Weijer C. The ethical analysis of risk. *J Law Med Ethics* 2000;28:344-61
10. Kassam-Adams N, Newman E. The reactions to research participation questionnaires for children and for parents (RRPQ-C and RRPQ-P). *Gen Hosp Psychiatry* 2002;24:336-42 doi: S0163834302002001 [pii]published Online First: Epub Date]].
11. Kassam-Adams N, Newman E. Child and parent reactions to participation in clinical research. *Gen Hosp Psychiatry* 2005;27:29-35 doi: S0163-8343(04)00106-9 [pii] 10.1016/j.genhosppsych.2004.08.007published Online First: Epub Date]].
12. Barakat LP, Patterson CA, Mondestin V, et al. Initial development of a questionnaire evaluating perceived benefits and barriers to pediatric clinical trials participation. *Contemp Clin Trials* 2013;34:218-26
13. Chu AT, DePrince AP, Weinzierl KM. Children's perception of research participation: Examining trauma exposure and distress. *Journal of Empirical Research on Human Research Ethics* 2008;3:pp doi: 10.1525/jer.2008.3.1.49 19385782published Online First: Epub Date]].
14. Staphorst MS, Hunfeld JA, Timman R, et al. Hearing the voices of children: self-reported information on children's experiences during research procedures: a study protocol. *BMJ Open* 2015;5:e009053 doi: bmjopen-2015-009053 [pii] 10.1136/bmjopen-2015-009053published Online First: Epub Date]].
15. Staphorst MS, Timman R, Passchier J, et al. The development of the 'Children's Discomfort During Research Procedures Questionnaire' (CDRPQ). Manuscript submitted for publication. 2016
16. Staphorst MS, Hunfeld JAM, van de Vathorst S, et al. Children's self reported discomforts as participants in clinical research. *Soc Sci Med* 2015;142:154-62 doi: 10.1016/j.socscimed.2015.08.019published Online First: Epub Date]].

17. Verhulst F, Van der Ende J, Koot H. Manual for the Child Behavior Checklist (in Dutch). Rotterdam: Department of Child and Adolescent Psychiatry, Erasmus Medical Centre/Sophia, 1996.
18. Seligman LD, Ollendick TH, Langley AK, et al. The utility of measures of child and adolescent anxiety: a meta-analytic review of the Revised Children's Manifest Anxiety Scale, the State-Trait Anxiety Inventory for Children, and the Child Behavior Checklist. *Journal of Clinical Child and Adolescent Psychology* 2004;33:557-65
19. Kendall PC, Puliafico AC, Barmish AJ, et al. Assessing anxiety with the child behavior checklist and the teacher report form. *Journal of Anxiety Disorders* 2007;21:1004-15
20. Spielberger C. *Manual for the state-trait anxiety inventory for children*. Palo Alto, California, USA: Consulting Psychologists Press, 1973.
21. Bakker F, Wieringen Pv, Ploeg Hvd, et al. *Handleiding bij de Zelf- Beoordelings Vragenlijst voor Kinderen, ZBV-K [Manual for the Self-Evaluation Questionnaire for Children, STAIC]*. Lisse, Netherlands: Swets & Zeitlinger, 1989.
22. Shah S, Whittle A, Wilfond B, et al. How do institutional review boards apply the federal risk and benefit standards for pediatric research? *JAMA* 2004;291:476-82
23. Janofsky J, Starfield B. Assessment of risk in research on children. *J Pediatr* 1981;98:842-6
24. US Department of Health and Human Services. Code of Federal Regulations. Human Subjects Research (45 CFR 46). 102 (i). , Revised July 14, 2009.
25. European Parliament CotEC. *Directive 2001*. Luxembourg: Office for Official Publications of the European Communities, 2001.
26. Alvarez C, Fernández Marcos A. Psychological treatment of evoked pain and anxiety by invasive medical procedures in paediatric oncology. *Psychology in Spain* 1997;1:17-36
27. Uman L, Birnie K, Noel M, et al. Psychological interventions for needle-related procedural pain and distress in children and adolescents. *Cochrane Database of Systematic Reviews* 2013:CD005179
28. Broome ME, Rehwaldt M, Fogg L. Relationships between cognitive behavioral techniques, temperament, observed distress, and pain reports in children and adolescents during lumbar puncture. *J Pediatr Nurs* 1998;13:48-54
29. Dahlquist LM, Busby SM, Slifer KJ, et al. Distraction for children of different ages who undergo repeated needle sticks. *J Pediatr Oncol Nurs* 2002;19:22-34
30. Nguyen TN, Nilsson S, Hellstrom AL, et al. Music therapy to reduce pain and anxiety in children with cancer undergoing lumbar puncture: a randomized clinical trial. *J Pediatr Oncol Nurs* 2010;27:146-55
31. DeMore M, Cohen LL. Distraction for pediatric immunization pain: A critical review. *Journal of Clinical Psychology in Medical Settings* 2005;12:281-91 doi: DOI 10.1007/s10880-005-7813-1published Online First: Epub Date]].
32. Tromp K, Vathorst Svd. Gatekeeping by professionals in recruitment of pediatric research participants: Indeed an undesirable practice. *The American Journal of Bioethics* 2015;15:30-32

**Table 1.** Description of the medical procedures

| <b>Procedure</b>        | <b>Description</b>                                                                                                                                                                                                                            |
|-------------------------|-----------------------------------------------------------------------------------------------------------------------------------------------------------------------------------------------------------------------------------------------|
| Buccal swab test        | Taking mucosal epithelial cells from the inner cheek lining using a small brush.                                                                                                                                                              |
| MRI-scan                | Magnetic Resonance Imaging of different parts of the body, particularly of the head. The MRI-scans lasted between 30 and 60 minutes and were performed without sedation.                                                                      |
| Pulmonary function test | Regular pulmonary function test that lasted between 15 and 30 minutes.                                                                                                                                                                        |
| Skin prick test         | Children were tested for 20 allergens. A droplet of each allergen was placed on the inner forearm and penetrated through to the skin using a specially modified lancet.                                                                       |
| Ultrasound imaging      | Ultrasound imaging used for research purposes was an echocardiogram. For clinical care purposes, ultrasound imaging was particularly an echocardiography and in some cases ultrasounds were made of the lymph nodes, the head or the abdomen. |
| Venepuncture            | One to three 10ml tubes of blood were collected. In one of the two studies children could choose to have EMLA-cream applied before the venepuncture. None of the children had a local anaesthetic.                                            |
| Dental check-up         | During the dental check-up a general check was carried out, dental plaque was removed and children were given instructions on how to brush their teeth correctly. A new appointment was made for dental caries or other abnormalities.        |



Table 2. Demographics

| Demographics                                  | Research<br>(N=307) | Dentist<br>(N=50) | Total<br>(N=357) |
|-----------------------------------------------|---------------------|-------------------|------------------|
| <b>Gender (%)</b>                             |                     |                   |                  |
| Boy                                           | 158 (51.5%)         | 27 (54%)          | 185 (51.8%)      |
| Girl                                          | 149 (48.5%)         | 23 (46%)          | 172 (48.2%)      |
| <b>Age (%)</b>                                |                     |                   |                  |
| Mean ± SD                                     | 10.5 ± 1.8          | 10.8 ± 1.5        | 10.6 ± 1.7       |
| < 12 years                                    | 273 (88.9%)         | 38 (76%)          | 311 (87.1%)      |
| ≥ 12 years                                    | 34 (11.1%)          | 12 (24%)          | 46 (12.9%)       |
| <b>Procedure (%)</b>                          |                     |                   |                  |
| Buccal Swab                                   | 25 (8.1%)           | -                 | 25 (7.0%)        |
| MRI                                           | 89 (29.0%)          | -                 | 89 (24.9%)       |
| Pulmonary function test                       | 9 (2.9%)            | -                 | 9 (2.5%)         |
| Skin prick test                               | 75 (24.4%)          | -                 | 75 (21.0%)       |
| Ultrasound imaging                            | 77 (25.1%)          | -                 | 77 (21.6%)       |
| Venepuncture                                  | 32 (10.4%)          | -                 | 32 (9.0%)        |
| Check-up visit at dentist                     | -                   | 50 (100%)         | 50 (14.0%)       |
| <b>Medical condition (%)</b>                  |                     |                   |                  |
| ADHD/ADD                                      | 4 (1.3%)            | -                 | 4 (1.1%)         |
| Cystic Fibrosis                               | 6 (2.0%)            | -                 | 6 (1.7%)         |
| Healthy (i.e. no known illness)               | 254 (82.7%)         | 50 (100%)         | 304 (85.2%)      |
| Inflammatory Bowel Disease                    | 36 (11.7%)          | -                 | 36 (10.1%)       |
| Oncological condition                         | 1 (0.3%)            | -                 | 1 (0.3%)         |
| Primary ciliary dyskinesia                    | 4 (1.3%)            | -                 | 4 (1.1%)         |
| Other condition                               | 2 (0.7%)            | -                 | 2 (0.6%)         |
| <b>Previous experience with procedure (%)</b> |                     |                   |                  |
|                                               | 148 (48.2%)         | 50 (100%)         | 198 (55.5%)      |
| <b>Trait-anxiety - STAI-C*</b>                |                     |                   |                  |
|                                               | <b>N=82</b>         | <b>N=36</b>       | <b>N=118</b>     |
| Mean ± SD                                     | 29.3 ± 5.7          | 28.9 ± 5.7        | 29.2 ± 5.9       |
| Range                                         | 20-44               | 22-42             | 20-44            |
| <b>Trait-anxiety - CBCL*</b>                  |                     |                   |                  |
|                                               | <b>N=192</b>        | <b>N=0</b>        | <b>N=192</b>     |
| Mean ± SD                                     | 1.0 ± 1.4           | -                 | 1.0 ± 1.4        |
| Range                                         | 0-6                 | -                 | 0-6              |

\* STAI-C = State Trait Anxiety Inventory for Children      CBCL = Child Behaviour Check List

**Table 3.** Discomfort from child’s perspective

*Example. “Were you bored while undergoing the MRI-scan?”*

- 1 = not
- 2 = slightly
- 3 = somewhat
- 4 = very
- 5 = extremely

|                         | Nervous |      | Annoyed |      | Pain |      | Frightened |      | Bored |      | Tired |      | Average discomfort score |      |
|-------------------------|---------|------|---------|------|------|------|------------|------|-------|------|-------|------|--------------------------|------|
|                         | Mean    | SD   | Mean    | SD   | Mean | SD   | Mean       | SD   | Mean  | SD   | Mean  | SD   | Mean                     | SD   |
| <b>Research</b>         |         |      |         |      |      |      |            |      |       |      |       |      |                          |      |
| Buccal swab             | 1.1     | 0.33 | 1.2     | 0.37 | 1.0  | 0.00 | 1.1        | 0.28 | 2.2   | 1.26 | 1.0   | 0.20 | 1.3                      | 0.26 |
| MRI                     | 1.8     | 0.88 | 1.4     | 0.74 | 1.1  | 0.30 | 1.3        | 0.56 | 1.7   | 0.93 | 2.3   | 1.28 | 1.6                      | 0.45 |
| Pulmonary function test | 1.2     | 0.44 | 2.1     | 1.05 | 1.2  | 0.44 | 1.0        | 0.00 | 2.6   | 1.01 | 2.4   | 1.01 | 1.8                      | 0.48 |
| Skin prick test         | 1.6     | 0.83 | 1.4     | 0.74 | 1.3  | 0.47 | 1.2        | 0.45 | 1.3   | 0.66 | 1.3   | 0.58 | 1.3                      | 0.35 |
| Ultrasound imaging      | 1.5     | 0.82 | 1.4     | 0.74 | 1.1  | 0.31 | 1.2        | 0.42 | 1.7   | 0.96 | 1.2   | 0.60 | 1.4                      | 0.32 |
| Venepuncture            | 1.9     | 1.04 | 2.1     | 0.98 | 1.9  | 0.59 | 1.5        | 0.95 | 1.8   | 0.92 | 1.3   | 0.46 | 1.7                      | 0.54 |
| <b>Dentist check-up</b> |         |      |         |      |      |      |            |      |       |      |       |      |                          |      |
|                         | 1.6     | 0.67 | 1.6     | 0.97 | 1.4  | 0.61 | 1.2        | 0.56 | 2.0   | 1.04 | 1.5   | 0.81 | 1.6                      | 0.48 |

\* Percentage of children that answered ‘very’ or ‘extremely’ on a question

\*\* On at least one discomfoting aspect

**Table 4.** Suggestions to reduce discomforts

| <b>Suggestion</b>             | <b>Number of children</b> | <b>Percentage (%)</b> |
|-------------------------------|---------------------------|-----------------------|
| (Distraction total)           | (192)                     | (62.6)                |
| - Movie                       | 185                       | 60.3                  |
| - Music                       | 1                         | 0.3                   |
| - Small talk                  | 2                         | 0.7                   |
| - Other form of distraction   | 4                         | 1.3                   |
| Less noise (MRI)              | 24                        | 7.8                   |
| Fewer physical sensations     | 11                        | 3.6                   |
| Warm gel (echoscope)          | 4                         | 1.3                   |
| Warmer room temperature (MRI) | 3                         | 1.0                   |
| Shorter duration              | 1                         | 0.3                   |
| Receiving present             | 1                         | 0.3                   |
| Other                         | 11                        | 3.6                   |
| No suggestion                 | 60                        | 19.5                  |
| <b>Total</b>                  | <b>307*</b>               | <b>100.0</b>          |

\* Only children in clinical research

## **AUTHORS' CONTRIBUTIONS**

MS conceptualized and designed this study, carried out the data collection, drafted the initial manuscript, and approved the final manuscript as submitted. JH, JP, and HG conceptualized and designed this study, supervised the study, reviewed and revised the manuscript, and approved the final manuscript as submitted. RT assisted with the statistical analyses of the data, reviewed and revised the manuscript, and approved the final manuscript as submitted. SV and JB conceptualized and designed this study, reviewed and revised the manuscript, and approved the final manuscript as submitted. MAB, MB, IB, KD, EH, VJ, KJ, JJ, AK, MK, JO, MP, LR, LdR, GHT, HT assisted with acquisition of data, reviewed and revised the manuscript, and approved the final manuscript as submitted.

## **FUNDING**

This work was supported by ZonMw (The Netherlands Organization for Health Research and Development), grant number 113203202.

## **COMPETING INTERESTS**

The authors declare that they have no competing interests.

## **DATA SHARING STATEMENT**

The dataset is available by contacting the corresponding author.

## Appendix A. Children's Discomfort during Research Procedures Questionnaire (CDRPQ)

1. Were you nervous while undergoing procedure X?
  - I was **not** nervous
  - I was **slightly** nervous
  - I was **somewhat** nervous
  - I was **very** nervous
  - I was **extremely** nervous
  
2. Was procedure X annoying?
  - Procedure X was **not** annoying
  - Procedure X was **slightly** annoying
  - Procedure X was **somewhat** annoying
  - Procedure X was **very** annoying
  - Procedure X was **extremely** annoying
  
3. Was procedure X painful?
  - Procedure X was **not** painful
  - Procedure X was **slightly** painful
  - Procedure X was **somewhat** painful
  - Procedure X was **very** painful
  - Procedure X was **extremely** painful
  
4. Were you frightened while undergoing procedure X?
  - I was **not** frightened
  - I was **slightly** frightened
  - I was **somewhat** frightened
  - I was **very** frightened
  - I was **extremely** frightened
  
5. Were you bored while undergoing procedure X?
  - I was **not** bored
  - I was **slightly** bored
  - I was **somewhat** bored
  - I was **very** bored
  - I was **extremely** bored
  
6. Did you find procedure X tiring?
  - It was **not** tiring
  - It was **slightly** tiring
  - It was **somewhat** tiring
  - It was **very** tiring
  - It was **extremely** tiring
  
7. Do you have any suggestions for making procedure X **less discomforting**?

Appendix B. Discomfort – percentages per procedure

Buccal swab test

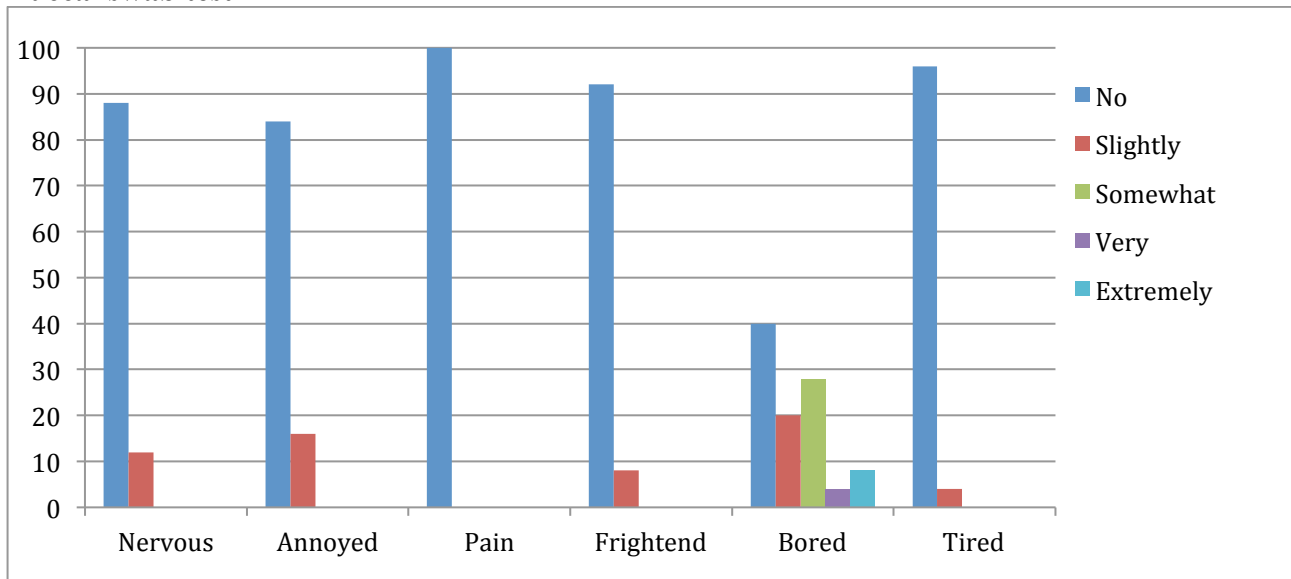

MRI-scan

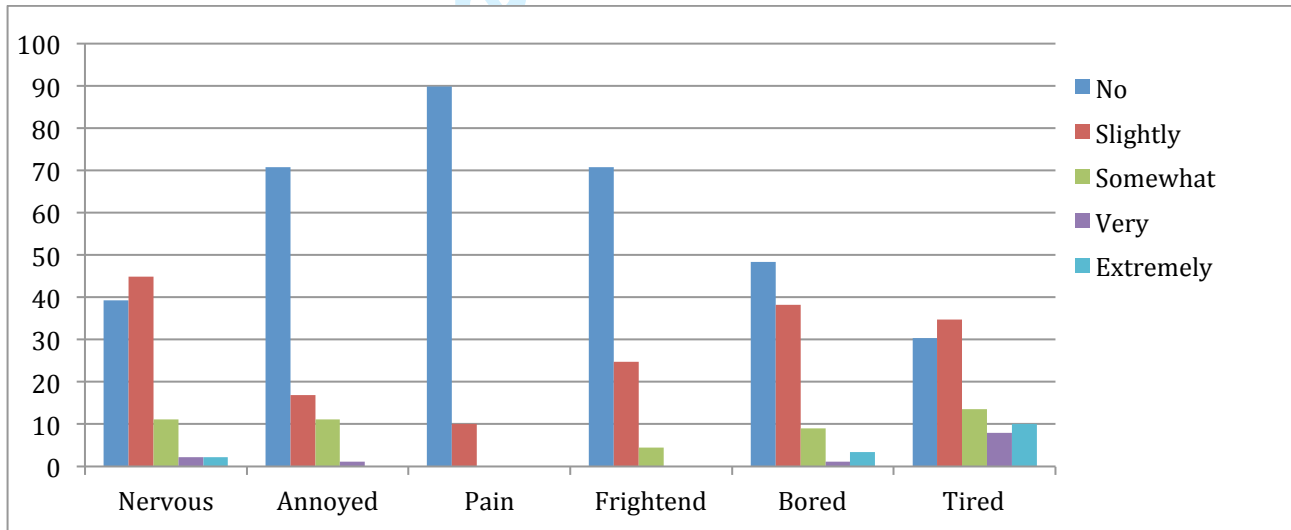

Pulmonary function test

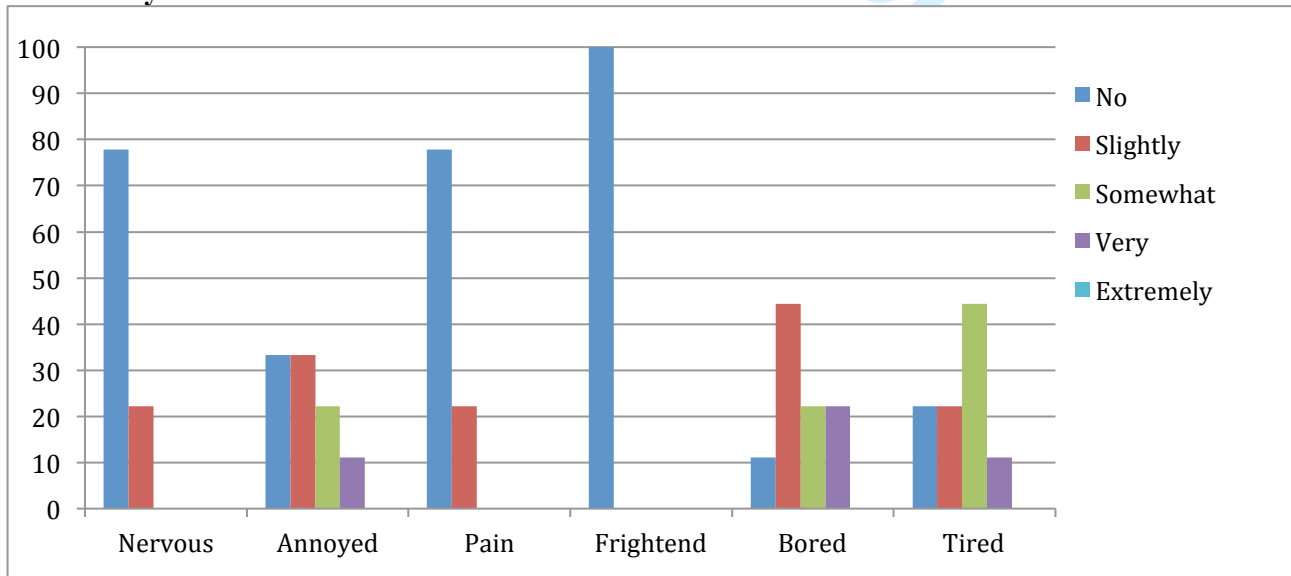

**Skin prick test**

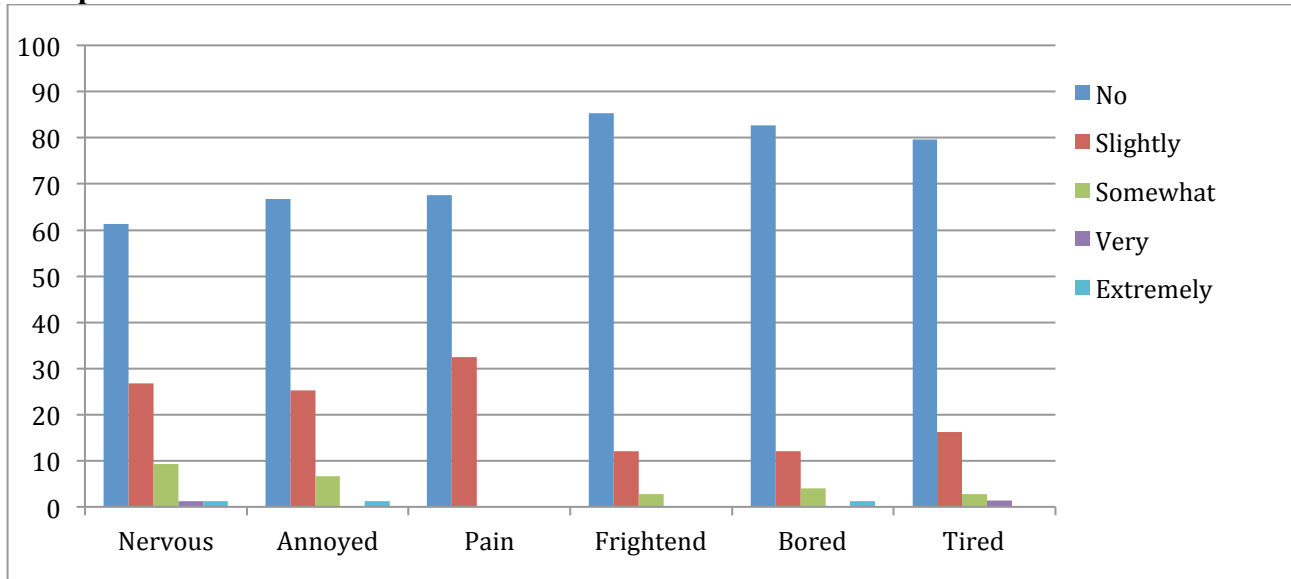

**Ultrasound imaging**

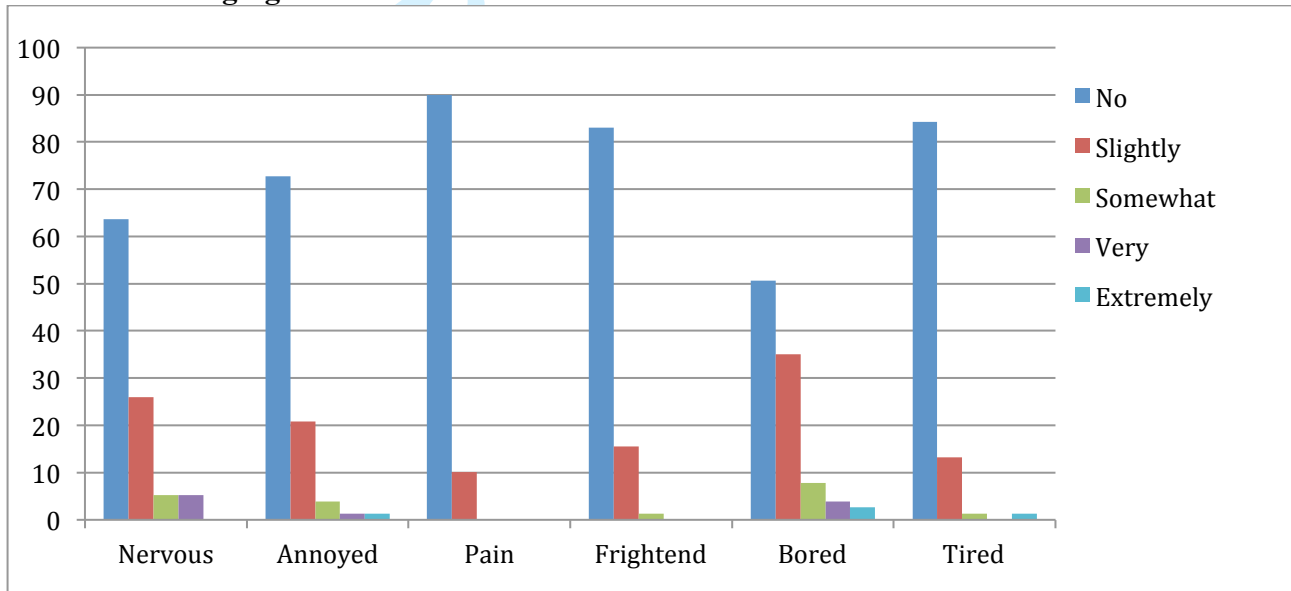

**Venipuncture**

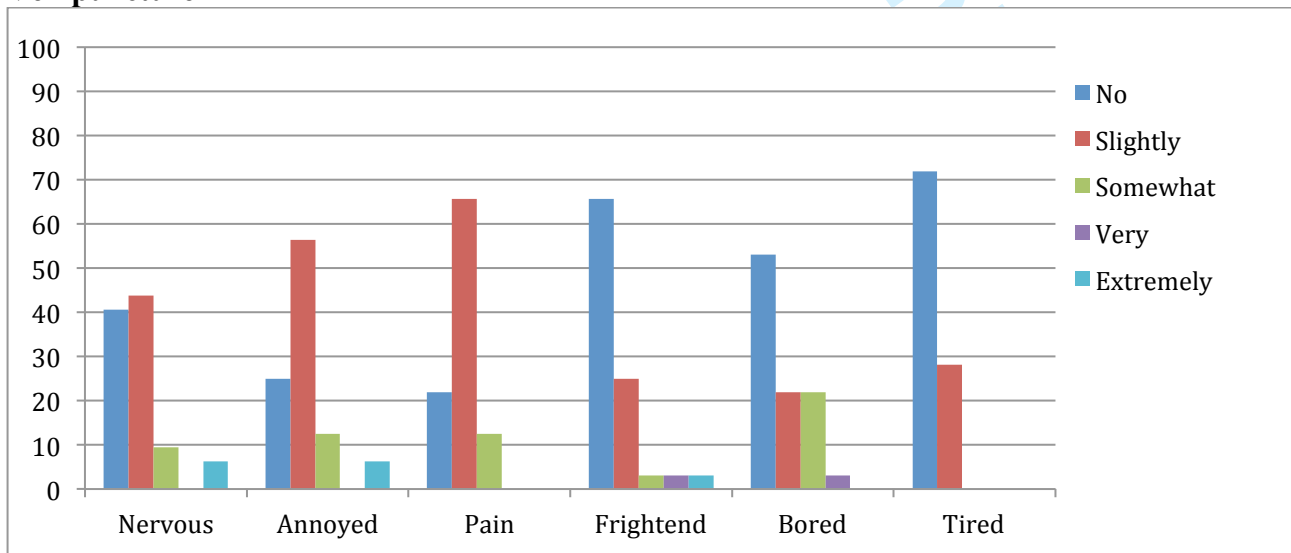

1  
2  
3  
4  
5  
6  
7  
8  
9  
10  
11  
12  
13  
14  
15  
16  
17  
18  
19  
20  
21  
22  
23  
24  
25  
26  
27  
28  
29  
30  
31  
32  
33  
34  
35  
36  
37  
38  
39  
40  
41  
42  
43  
44  
45  
46  
47  
48  
49  
50  
51  
52  
53  
54  
55  
56  
57  
58  
59  
60

**Dental check-up**

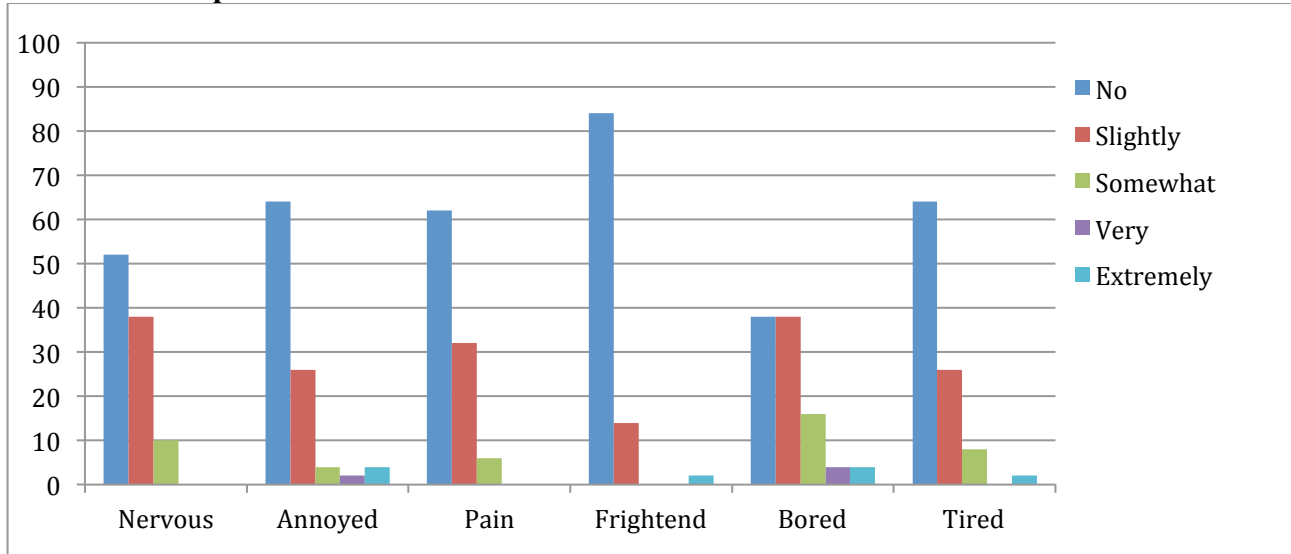

peer review only



## STROBE Statement—checklist of items that should be included in reports of observational studies

|                          | Item No | Recommendation                                                                                                                                                                                                                                                                                                                                                                                                                                                         | Check                                           | Page, line number(s)         |
|--------------------------|---------|------------------------------------------------------------------------------------------------------------------------------------------------------------------------------------------------------------------------------------------------------------------------------------------------------------------------------------------------------------------------------------------------------------------------------------------------------------------------|-------------------------------------------------|------------------------------|
| Title and abstract       | 1       | (a) Indicate the study's design with a commonly used term in the title or the abstract                                                                                                                                                                                                                                                                                                                                                                                 | Yes                                             | p1, lines 1-2                |
|                          |         | (b) Provide in the abstract an informative and balanced summary of what was done and what was found                                                                                                                                                                                                                                                                                                                                                                    | Yes                                             | p3-4, lines 43-49, 58-63     |
| <b>Introduction</b>      |         |                                                                                                                                                                                                                                                                                                                                                                                                                                                                        |                                                 |                              |
| Background/rationale     | 2       | Explain the scientific background and rationale for the investigation being reported                                                                                                                                                                                                                                                                                                                                                                                   | Yes                                             | p6-7, lines 87-123           |
| Objectives               | 3       | State specific objectives, including any prespecified hypotheses                                                                                                                                                                                                                                                                                                                                                                                                       | Yes                                             | p6-7, lines 104-123          |
| <b>Methods</b>           |         |                                                                                                                                                                                                                                                                                                                                                                                                                                                                        |                                                 |                              |
| Study design             | 4       | Present key elements of study design early in the paper                                                                                                                                                                                                                                                                                                                                                                                                                | Yes                                             | p8-9, lines 148-160          |
| Setting                  | 5       | Describe the setting, locations, and relevant dates, including periods of recruitment, exposure, follow-up, and data collection                                                                                                                                                                                                                                                                                                                                        | Yes                                             | p7, lines 143-146 + abstract |
| Participants             | 6       | (a) <i>Cohort study</i> —Give the eligibility criteria, and the sources and methods of selection of participants. Describe methods of follow-up<br><i>Case-control study</i> —Give the eligibility criteria, and the sources and methods of case ascertainment and control selection. Give the rationale for the choice of cases and controls<br><i>Cross-sectional study</i> —Give the eligibility criteria, and the sources and methods of selection of participants | Yes                                             | p7-8, lines 127-146          |
|                          |         | (b) <i>Cohort study</i> —For matched studies, give matching criteria and number of exposed and unexposed<br><i>Case-control study</i> —For matched studies, give matching criteria and the number of controls per case                                                                                                                                                                                                                                                 | N/A                                             |                              |
| Variables                | 7       | Clearly define all outcomes, exposures, predictors, potential confounders, and effect modifiers. Give diagnostic criteria, if applicable                                                                                                                                                                                                                                                                                                                               | Yes                                             | p9-11, lines 163-213         |
| Data sources/measurement | 8*      | For each variable of interest, give sources of data and details of methods of assessment (measurement). Describe comparability of assessment methods if there is more than one group                                                                                                                                                                                                                                                                                   | Yes                                             | p9-11, lines 163-213         |
| Bias                     | 9       | Describe any efforts to address potential sources of bias                                                                                                                                                                                                                                                                                                                                                                                                              | Yes. In the limitation section, we describe the |                              |

|                        |     |                                                                                                                                                                                                                                                                                                           |                                                                                                                                                                                                              |                       |
|------------------------|-----|-----------------------------------------------------------------------------------------------------------------------------------------------------------------------------------------------------------------------------------------------------------------------------------------------------------|--------------------------------------------------------------------------------------------------------------------------------------------------------------------------------------------------------------|-----------------------|
|                        |     |                                                                                                                                                                                                                                                                                                           | potential selection bias of our study sample. However, this bias cannot be addressed because children in clinical research are already a biased group (i.e. they gave assent for participating in research). |                       |
| Study size             | 10  | Explain how the study size was arrived at                                                                                                                                                                                                                                                                 | Yes                                                                                                                                                                                                          | p7-8, lines 126-133   |
| Quantitative variables | 11  | Explain how quantitative variables were handled in the analyses. If applicable, describe which groupings were chosen and why                                                                                                                                                                              | Yes                                                                                                                                                                                                          | p11, line 219         |
| Statistical methods    | 12  | (a) Describe all statistical methods, including those used to control for confounding                                                                                                                                                                                                                     | Yes                                                                                                                                                                                                          | p11-12, lines 215-229 |
|                        |     | (b) Describe any methods used to examine subgroups and interactions                                                                                                                                                                                                                                       | Yes                                                                                                                                                                                                          | p11-12, lines 219-224 |
|                        |     | (c) Explain how missing data were addressed                                                                                                                                                                                                                                                               | N/A                                                                                                                                                                                                          |                       |
|                        |     | (d) <i>Cohort study</i> —If applicable, explain how loss to follow-up was addressed<br><i>Case-control study</i> —If applicable, explain how matching of cases and controls was addressed<br><i>Cross-sectional study</i> —If applicable, describe analytical methods taking account of sampling strategy | N/A → we used a convenience sample                                                                                                                                                                           |                       |
|                        |     | (e) Describe any sensitivity analyses                                                                                                                                                                                                                                                                     | N/A                                                                                                                                                                                                          |                       |
| <b>Results</b>         |     |                                                                                                                                                                                                                                                                                                           |                                                                                                                                                                                                              |                       |
| Participants           | 13* | (a) Report numbers of individuals at each stage of study—eg numbers potentially eligible, examined for eligibility, confirmed eligible, included in the study, completing follow-up, and analysed                                                                                                         | Yes                                                                                                                                                                                                          | p12, lines 237-243    |
|                        |     | (b) Give reasons for non-participation at each stage                                                                                                                                                                                                                                                      | Yes                                                                                                                                                                                                          | p12, lines 242-       |

|                          |     |                                                                                                                                                                                                              |     |                                                |
|--------------------------|-----|--------------------------------------------------------------------------------------------------------------------------------------------------------------------------------------------------------------|-----|------------------------------------------------|
|                          |     |                                                                                                                                                                                                              |     | 243                                            |
|                          |     | (c) Consider use of a flow diagram                                                                                                                                                                           | No  |                                                |
| Descriptive data         | 14* | (a) Give characteristics of study participants (eg demographic, clinical, social) and information on exposures and potential confounders                                                                     | Yes | p12, lines 243-246 + Table 2.                  |
|                          |     | (b) Indicate number of participants with missing data for each variable of interest                                                                                                                          | Yes | Table 2.                                       |
|                          |     | (c) <i>Cohort study</i> —Summarise follow-up time (eg, average and total amount)                                                                                                                             | N/A |                                                |
| Outcome data             | 15* | <i>Cohort study</i> —Report numbers of outcome events or summary measures over time                                                                                                                          | N/A |                                                |
|                          |     | <i>Case-control study</i> —Report numbers in each exposure category, or summary measures of exposure                                                                                                         | N/A |                                                |
|                          |     | <i>Cross-sectional study</i> —Report numbers of outcome events or summary measures                                                                                                                           | Yes | Table 2.                                       |
| Main results             | 16  | (a) Give unadjusted estimates and, if applicable, confounder-adjusted estimates and their precision (eg, 95% confidence interval). Make clear which confounders were adjusted for and why they were included | Yes | p13, lines 248-265                             |
|                          |     | (b) Report category boundaries when continuous variables were categorized                                                                                                                                    | N/A |                                                |
|                          |     | (c) If relevant, consider translating estimates of relative risk into absolute risk for a meaningful time period                                                                                             | N/A |                                                |
| Other analyses           | 17  | Report other analyses done—eg analyses of subgroups and interactions, and sensitivity analyses                                                                                                               | Yes | p13-14, lines 267-278                          |
| <b>Discussion</b>        |     |                                                                                                                                                                                                              |     |                                                |
| Key results              | 18  | Summarise key results with reference to study objectives                                                                                                                                                     | Yes | p14-15, lines 283-308                          |
| Limitations              | 19  | Discuss limitations of the study, taking into account sources of potential bias or imprecision. Discuss both direction and magnitude of any potential bias                                                   | Yes | p16-17, lines 319-344                          |
| Interpretation           | 20  | Give a cautious overall interpretation of results considering objectives, limitations, multiplicity of analyses, results from similar studies, and other relevant evidence                                   | Yes | p14-15, lines 284-308<br>p19-20, lines 405-408 |
| Generalisability         | 21  | Discuss the generalisability (external validity) of the study results                                                                                                                                        | Yes | p16, lines 328-331<br>p19, lines 386-388       |
| <b>Other information</b> |     |                                                                                                                                                                                                              |     |                                                |
| Funding                  | 22  | Give the source of funding and the role of the funders for the present study and, if applicable, for the original study on which the present article is based                                                | Yes | p27                                            |

1  
2  
3  
4  
5  
6  
7  
8  
9  
10  
11  
12  
13  
14  
15  
16  
17  
18  
19  
20  
21  
22  
23  
24  
25  
26  
27  
28  
29  
30  
31  
32  
33  
34  
35  
36  
37  
38  
39  
40  
41  
42  
43  
44  
45  
46  
47

\*Give information separately for cases and controls in case-control studies and, if applicable, for exposed and unexposed groups in cohort and cross-sectional studies.

**Note:** An Explanation and Elaboration article discusses each checklist item and gives methodological background and published examples of transparent reporting. The STROBE checklist is best used in conjunction with this article (freely available on the Web sites of PLoS Medicine at <http://www.plosmedicine.org/>, Annals of Internal Medicine at <http://www.annals.org/>, and Epidemiology at <http://www.epidem.com/>). Information on the STROBE Initiative is available at [www.strobe-statement.org](http://www.strobe-statement.org).

For peer review only
