# Supplementary material for: The child's perspective on discomfort during medical research procedures: a descriptive study
Source: PubMed Central journal article supplement — BMJ Open. 2017 Aug 1;7(7):e016077. doi: 10.1136/bmjopen-2017-016077 (PMC5642655; doi:10.1136/bmjopen-2017-016077), 2017-08-01
Supplement: bmjopen-2017-016077supp001.pdf [file bmjopen-2017-016077supp001.pdf]

## Appendix A. Children's Discomfort during Research Procedures Questionnaire (CDRPQ)

1. Were you nervous while undergoing procedure X?
  - I was **not** nervous
  - I was **slightly** nervous
  - I was **somewhat** nervous
  - I was **very** nervous
  - I was **extremely** nervous
  
2. Was procedure X annoying?
  - Procedure X was **not** annoying
  - Procedure X was **slightly** annoying
  - Procedure X was **somewhat** annoying
  - Procedure X was **very** annoying
  - Procedure X was **extremely** annoying
  
3. Was procedure X painful?
  - Procedure X was **not** painful
  - Procedure X was **slightly** painful
  - Procedure X was **somewhat** painful
  - Procedure X was **very** painful
  - Procedure X was **extremely** painful
  
4. Were you frightened while undergoing procedure X?
  - I was **not** frightened
  - I was **slightly** frightened
  - I was **somewhat** frightened
  - I was **very** frightened
  - I was **extremely** frightened
  
5. Were you bored while undergoing procedure X?
  - I was **not** bored
  - I was **slightly** bored
  - I was **somewhat** bored
  - I was **very** bored
  - I was **extremely** bored
  
6. Did you find procedure X tiring?
  - It was **not** tiring
  - It was **slightly** tiring
  - It was **somewhat** tiring
  - It was **very** tiring
  - It was **extremely** tiring
  
7. Do you have any suggestions for making procedure X **less discomforting**?
