# Supplementary material for: The child's perspective on discomfort during medical research procedures: a descriptive study
Source: PubMed Central journal article supplement — BMJ Open. 2017 Aug 1;7(7):e016077. doi: 10.1136/bmjopen-2017-016077 (PMC5642655; doi:10.1136/bmjopen-2017-016077), 2017-08-01

## Appendix B. Discomfort – percentages per procedure

### Buccal swab test

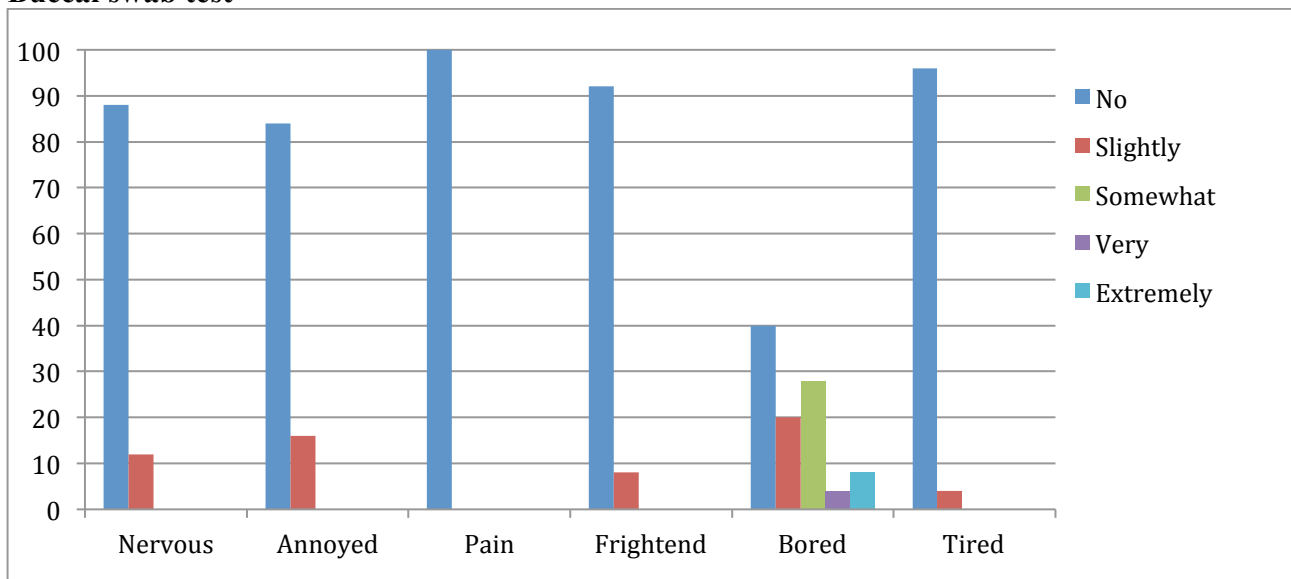

### MRI-scan

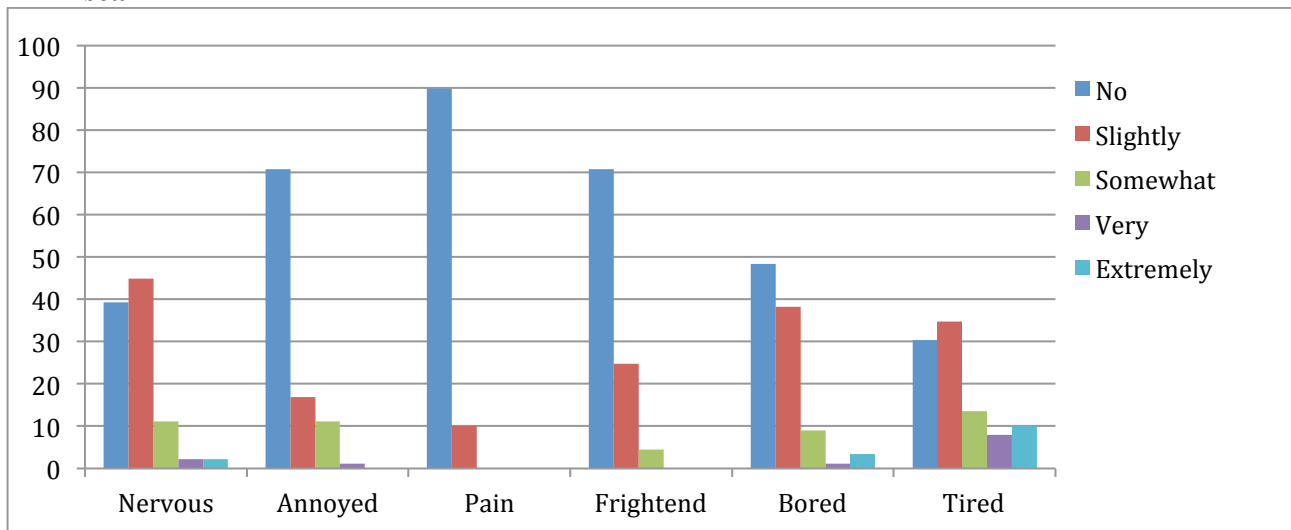

### Pulmonary function test

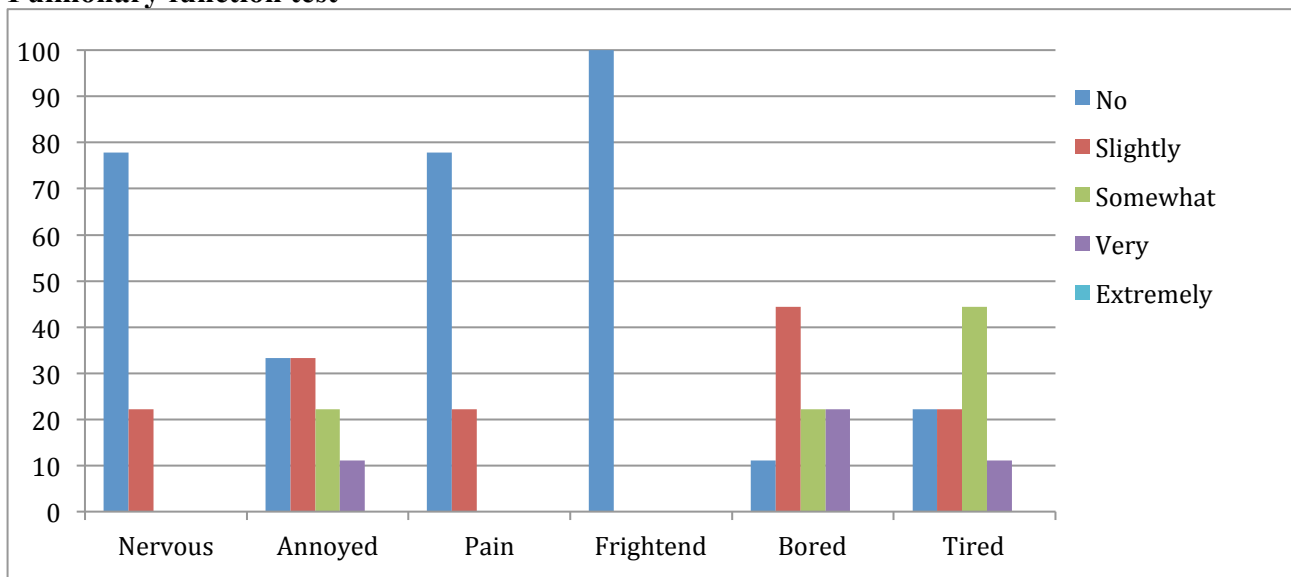

### Skin prick test

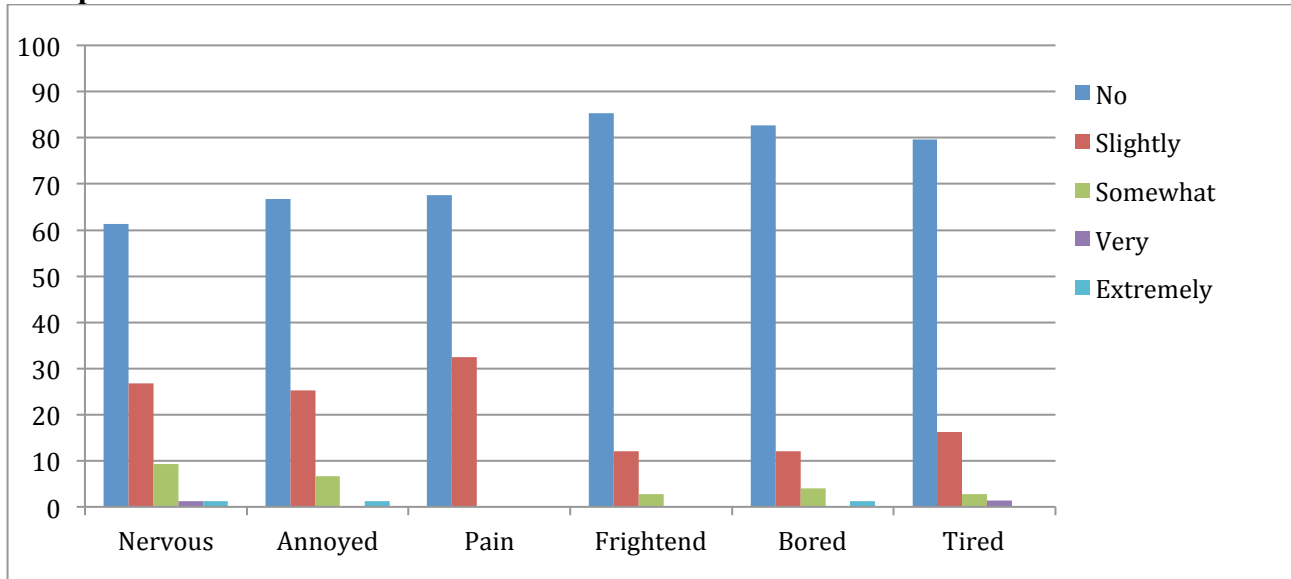

### Ultrasound imaging

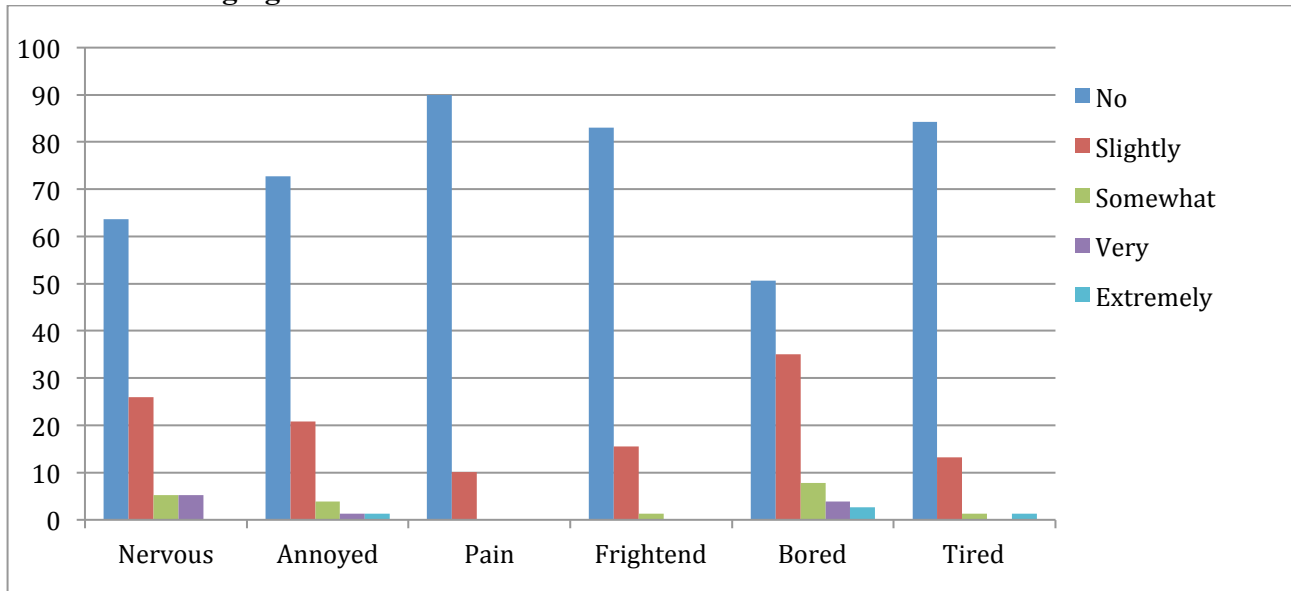

### Venipuncture

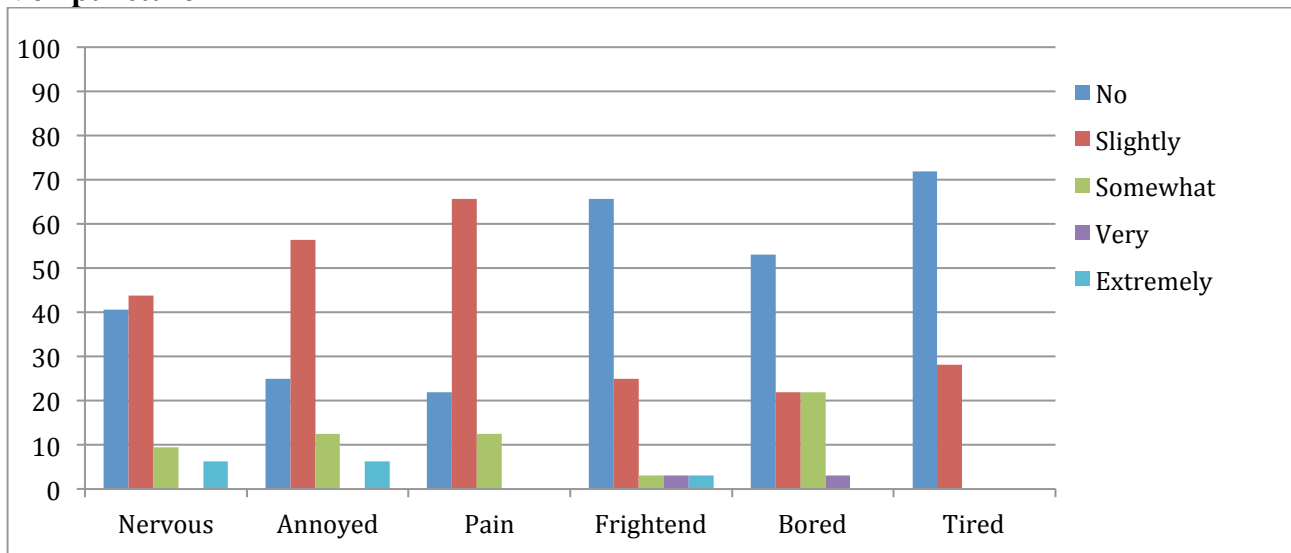

## Dental check-up

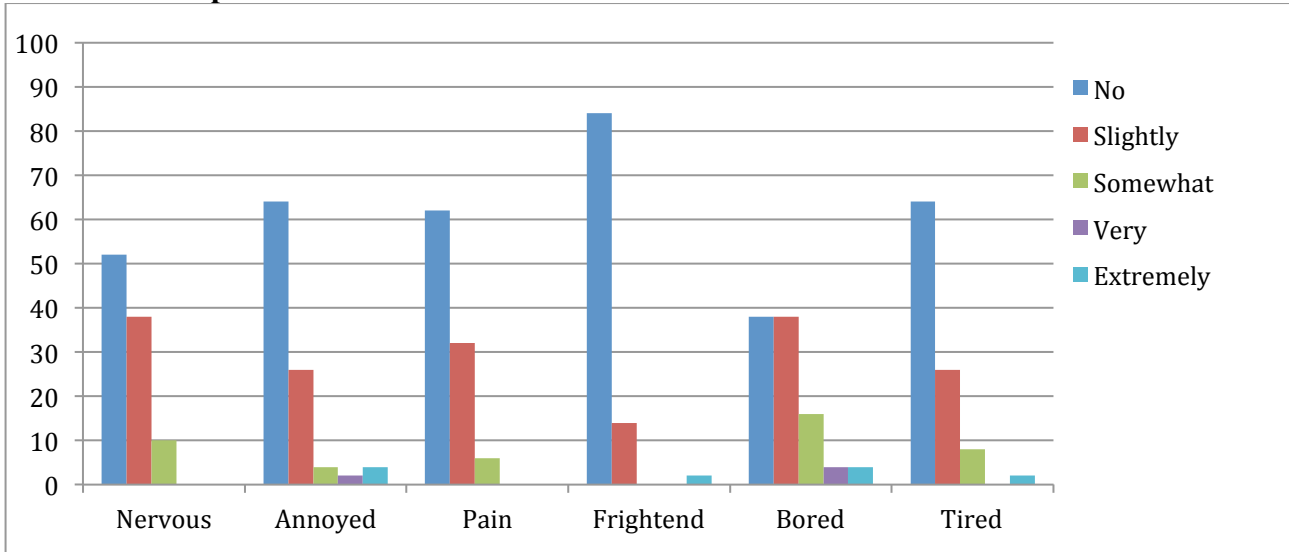

Supplement: bmjopen-2017-016077supp002.pdf [file bmjopen-2017-016077supp002.pdf]
